1  
2  
3  
4 **Retrograde adenosine/A<sub>2A</sub> receptor signaling mediates presynaptic**  
5 **hippocampal LTP and facilitates epileptic seizures**  
6

7 Kaoutsar Nasrallah<sup>1</sup>, Coralie Berthoux<sup>1</sup>, Yuki Hashimotodani<sup>4</sup>, Andrés E. Chávez<sup>5</sup>, Michelle  
8 Gulfo<sup>1</sup>, Rafael Luján<sup>3</sup>, Pablo E. Castillo<sup>1,2,\*</sup>  
9

10  
11 <sup>1</sup> Dominick P. Purpura Department of Neuroscience, <sup>2</sup> Department of Psychiatry & Behavioral  
12 Sciences, Albert Einstein College of Medicine, Bronx, NY 10461, U.S.A.; <sup>3</sup> Instituto de  
13 Investigación en Discapacidades Neurológicas (IDINE), Facultad de Medicina, Universidad  
14 Castilla-La Mancha, 02008 Albacete, Spain.  
15

16  
17 <sup>4</sup> Present address: Graduate School of Brain Science, Doshisha University, Kyoto, Japan;

18 <sup>5</sup> Present address: Centro Interdisciplinario de Neurociencia de Valparaíso, Facultad de  
19 Ciencias, Universidad de Valparaíso, Valparaíso 2340000, Chile  
20

21  
22 Running title: Adenosine/A<sub>2A</sub> receptor mediates presynaptic hippocampal LTP  
23

24  
25 Keywords: Hippocampus, mossy cell, dentate gyrus, retrograde signaling, pattern separation,  
26 epilepsy, presynaptic, BDNF, TrkB, PKA.  
27

28  
29 \* To whom correspondence should be addressed:  
30

31 Pablo E. Castillo, MD/PhD  
32 Dominick P. Purpura Department of Neuroscience  
33 Albert Einstein College of Medicine  
34 1410 Pelham Parkway South  
35 Kennedy Center, Room 703  
36 Bronx, NY 10461, USA  
37 Email: [pablo.castillo@einsteinmed.org](mailto:pablo.castillo@einsteinmed.org)  
38  
39  
40

41 Title: 115 characters (with spaces)

42 Total number of words: Summary: 150; Introduction: 454; Results: 2,173; Discussion: 1,582

43 Methods: 2,624

44 Figures: 8; Supplementary figures: 6  
45

46  
47 **Abstract**  
48  
49  
50  
51 A long-term change in neurotransmitter release is a widely expressed mechanism  
52 controlling neural circuits in the mammalian brain. This presynaptic plasticity is commonly  
53 mediated by retrograde signaling whereby a messenger released from the postsynaptic  
54 neuron upon activity modifies neurotransmitter release in a long-term manner by targeting  
55 a presynaptic receptor. In the dentate gyrus (DG), the main input area of the hippocampus,  
56 granule cells (GCs) and mossy cells (MCs) form a recurrent excitatory circuit that is  
57 critically involved in DG function and epilepsy. Here, we identified adenosine/A<sub>2A</sub> receptor  
58 (A<sub>2A</sub>R) as a novel retrograde signaling system that mediates presynaptic long-term  
59 potentiation (LTP) at MC-GC synapses. Using an adenosine sensor, we found that  
60 neuronal activity triggered phasic, postsynaptic TrkB-dependent release of adenosine.  
61 Additionally, epileptic seizures released adenosine *in vivo*, while removing A<sub>2A</sub>Rs from DG  
62 decreased seizure susceptibility. Thus, adenosine/A<sub>2A</sub>R retrograde signaling mediates  
63 presynaptic LTP that may contribute to DG-dependent learning and promote epilepsy.  
64

## 65 INTRODUCTION

66  
67 The dentate gyrus (DG), a major input area of the hippocampus, contains two types of  
68 excitatory neurons: dentate granule cells (GCs) and hilar mossy cells (MCs). MCs and  
69 GCs form an important but under-investigated associative circuit, that is proposed to play  
70 a key role in DG-dependent cognitive functions<sup>1,2</sup> and epilepsy<sup>3-5</sup>. Repetitive stimulation of  
71 MC axons with physiologically relevant patterns of activity triggers robust presynaptic  
72 long-term potentiation at MC-GC synapses (MC-GC LTP)<sup>6</sup>. Remarkably, recent evidence  
73 supports that MC-GC LTP can be induced *in vivo* by enriched environment exposure<sup>7</sup>,  
74 and following experimental epileptic activity<sup>8</sup>. Uncontrolled strengthening of MC-GC  
75 transmission promotes seizures and contribute to the pro-epileptic role of MCs in early  
76 epilepsy<sup>8</sup>. MC-GC LTP is mechanistically unique. Its induction is NMDA receptor-  
77 independent but requires postsynaptic BDNF/TrkB and presynaptic cAMP/PKA signaling<sup>6</sup>,  
78 strongly suggesting the involvement of a retrograde signal whose identity remains  
79 unknown.

80  
81 Retrograde signaling from the postsynapse to the presynapse is a well-established  
82 mechanism implicated in presynaptic forms of long-term plasticity<sup>9</sup>. In this way, the target  
83 neuron can strengthen or weaken the synaptic inputs it receives. Diverse messengers  
84 have been identified, including lipids, gases, peptides and conventional  
85 neurotransmitters<sup>10</sup>. Typically, these messengers are released upon neuronal activity and  
86 target a presynaptic receptor (or other molecular target), thereby establishing a retrograde  
87 signaling system. The following criteria must be satisfied to establish retrograde signaling  
88 as a mechanism of presynaptic long-term plasticity. The retrograde messenger must be  
89 synthesized and released from the postsynaptic compartment; interfering with the  
90 synthesis and/or release of this messenger should prevent plasticity; the target for the  
91 retrograde messenger must be present in the presynaptic bouton; interfering with the  
92 presynaptic target should also prevent plasticity; and lastly, activation of the presynaptic  
93 target by the retrograde messenger or some analogous molecule should mimic long-term  
94 plasticity –although in some cases this activation alone may not be sufficient to mimic  
95 plasticity.

96  
97 In this study, we sought to determine the retrograde signal involved in presynaptic LTP at  
98 MC-GC synapses. To our surprise, we found that most conventional retrograde  
99 messengers were not implicated in this form of plasticity. Using single-cell manipulations  
100 and selective pharmacology, we discovered that activation of G<sub>s</sub>-coupled adenosine A<sub>2A</sub>  
101 receptors (A<sub>2A</sub>Rs) are necessary and sufficient to induce MC-GC LTP. Interfering with  
102 adenosine release from a single GC abolished LTP, and immunoelectron microscopy  
103 revealed A<sub>2A</sub>Rs at MC axon terminals. In addition, using a genetically encoded adenosine  
104 sensor, we found that neuronal activity triggered phasic release of adenosine in a  
105 postsynaptic TrkB-dependent manner. Furthermore, acutely induced epileptic seizures  
106 released adenosine *in vivo*, while removing A<sub>2A</sub>Rs from DG decreased seizure  
107 susceptibility. Our findings not only establish adenosine/A<sub>2A</sub>R as a novel retrograde  
108 signaling system that mediates presynaptic plasticity but may also provide a mechanism  
109 by which BDNF/TrkB and A<sub>2A</sub>Rs may promote epileptic activity.

## 110 RESULTS

111

### 112 Theta burst firing of a single GC induces presynaptic LTP at MC-GC synapse

113

114 To investigate the identity of the retrograde signal mediating MC-GC LTP, we first tested  
115 whether activation of a single GC, a manipulation previously used to characterize  
116 endocannabinoid retrograde signaling in long-term plasticity<sup>11</sup>, could trigger MC-GC LTP.  
117 We found that GC theta-burst firing (TBF: 10 bursts at 5 Hz of 5 AP at 50 Hz, repeated 4  
118 times every 5s, **Fig. 1a**) induced LTP selectively at MC-GC synapses but not at  
119 neighboring medial perforant path (MPP) inputs (**Fig. 1b**). In addition, the group II mGluR  
120 agonist DCG-IV (1  $\mu$ M), which selectively abolishes GC-MC but not MC-GC  
121 transmission<sup>12</sup>, did not affect the magnitude of TBF-induced LTP (**Fig. 1f** and **Fig. S1a**),  
122 indicating this plasticity does not rely on the recruitment of MCs. Like synaptically-induced  
123 MC-GC LTP<sup>6,7</sup>, TBF-LTP is likely expressed presynaptically, as indicated by a significant  
124 reduction in both paired-pulse ratio (PPR) and coefficient of variation (CV) (**Fig. 1c**). Like  
125 synaptically-induced MC-GC LTP, TBF-LTP requires postsynaptic BDNF release,  
126 postsynaptic but not presynaptic TrkB, and presynaptic cAMP/PKA signaling. Indeed,  
127 TBF-LTP was abolished in the presence of the selective TrkB antagonist ANA-12 (15  $\mu$ M)  
128 (**Fig. S1b** and **Fig. 1f**), and in postsynaptic but not presynaptic *TrkB* conditional knockout  
129 (cKO) mice (**Fig. 1d,f** and **Fig. S1c**). TBF-LTP was also abolished in postsynaptic *Bdnf*  
130 cKO mice, and in GC patch-loaded with botulinum toxin-B (Botox, 0.5  $\mu$ M; **Fig. S1d,e** and  
131 **Fig. 1f**), which blocks BDNF release<sup>13</sup>. The PKA inhibitors, H89 (10  $\mu$ M, 40- to 60-min pre-  
132 incubation and bath applied) (**Fig. S1f** and **Fig. 1f**) and PKI<sub>14-22</sub> myristoylated (1  $\mu$ M, 40-  
133 to 60-min pre-incubation and bath applied) also abolished TBF-LTP, whereas loading the  
134 membrane-impermeant PKI<sub>6-22</sub> (2.5  $\mu$ M) in GCs had no effect on this LTP (**Fig. 1e,f**). TBF-  
135 LTP was also NMDAR-independent as it was normally induced in the presence of D-APV  
136 (50  $\mu$ M) (**Fig. S1g** and **Fig. 1f**). Lastly, synaptically-induced MC-GC LTP —i.e. burst  
137 stimulation (BS) of MC axons— and TBF-LTP occluded each other (**Fig. S2**), strongly  
138 suggesting a common mechanism. Thus, the fact that a single-cell manipulation (GC TBF)  
139 induced presynaptic LTP of MC-GC transmission with identical properties as synaptically-  
140 induced MC-GC LTP, not only strengthens the involvement of retrograde signaling in this  
141 form of plasticity, but also establishes a simple tool to investigate the identity of the  
142 retrograde messenger as this induction method presumably does not recruit molecular  
143 signals arising from neighboring cells.

144

145

### 146 A non-conventional retrograde signal likely mediates presynaptic LTP at MC-GC 147 synapses

148

149 Previous work indicates that retrograde signaling mediating MC-GC LTP does not involve  
150 endocannabinoids, glutamate or GABA<sup>6,14</sup>, and our current finding that TBF-LTP was  
151 normally induced in presynaptic *TrkB* cKO (**Fig. S1c** and **Fig. 1f**), discards BDNF as  
152 retrograde messenger. Thus, we tested the role of other conventional retrograde  
153 messengers, such as nitric oxide (NO) and lipid-derived messengers<sup>10</sup>. Application of the  
154 NO synthase inhibitor L-NAME (100  $\mu$ M, 50- to 90-min pre-incubation and bath applied)

155 did not impair TBF-LTP (**Fig. 2a**), but it significantly reduced LTP at CA3-CA1 synapses  
156 (**Fig. 2b**), as previously reported<sup>15</sup>. Blockade of lipid-derived messengers with a cocktail  
157 of inhibitors consisting of the FAAH and anandamide amidase inhibitor AACOCF3 (10  $\mu$ M,  
158 50- to 80-min pre-incubation and bath applied), the lipoxygenases inhibitor baicalein (3  
159  $\mu$ M, 50- to 80-min pre-incubation and bath applied) and the lipase inhibitor THL  
160 (tetrahydrolipstatin or orlistat, 4  $\mu$ M in the recording pipette) did not impair TBF-LTP either  
161 (**Fig. 2c**). As positive control, we found that both AACOCF3 and baicalein significantly  
162 reduced LTD at CA3-CA1 synapses (**Fig. 2d**) and loading the lipase inhibitor THL (4  $\mu$ M)  
163 in the recording pipette efficiently blocked CA1 inhibitory LTD (iLTD) (**Fig. 2e**)<sup>16</sup>. Lastly, as  
164 for TBF-LTP, blocking NO signaling and lipid-derived messengers did not alter  
165 synaptically-induced LTP either (**Fig. S3**). Altogether, our results strongly suggest the  
166 involvement of a non-conventional retrograde messenger in presynaptic MC-GC LTP.

### 167 168 **Presynaptic A<sub>2A</sub>Rs are required for activity-dependent strengthening of MC-GC** 169 **synapses**

171 Presynaptic PKA signaling is necessary and sufficient to induce LTP of MC-GC synaptic  
172 transmission<sup>6</sup>, raising the possibility that the retrograde messenger induces LTP by  
173 activating Gs-coupled GPCRs located on MC axon terminals. The Gs-coupled adenosine  
174 A<sub>2A</sub> receptor (A<sub>2A</sub>R) is a good candidate as it has been implicated in BDNF-mediated  
175 plasticity at other synapses<sup>17-19</sup>, and the endogenous ligand adenosine can be released  
176 from neurons upon activity<sup>20-24</sup>. To test whether adenosine mediates MC-GC LTP by  
177 activating presynaptic A<sub>2A</sub>Rs, we first examined whether LTP induction requires A<sub>2A</sub>Rs.  
178 Remarkably, two different A<sub>2A</sub>R selective antagonists, SCH 58261 (100 nM) and  
179 ZM241385 (50 nM), abolished TBF-LTP (**Fig. 3a**). Moreover, bath application of SCH  
180 58261 did not change basal transmission (**Fig. 3b**) but prevented the induction of LTP by  
181 BDNF puffs (8 nM, 2 puffs of 3 s) delivered in the inner molecular layer (IML) (**Fig. 3c**)<sup>6</sup>,  
182 suggesting that A<sub>2A</sub>R activation is required downstream of the BDNF/TrkB cascade.  
183 Postsynaptic A<sub>2A</sub>Rs were not involved given that including the G-coupled protein inhibitor  
184 GDP $\beta$ s (1 mM) in the recording pipette did not affect TBF-LTP, (**Fig. 3d**), whereas it  
185 abolished the change in holding current induced by the selective GABA<sub>B</sub> receptor agonist  
186 baclofen (10  $\mu$ M) (**Fig. 3d**). Likewise, BS-induced LTP was also abolished by SCH 58261  
187 (**Fig. S4a**), but not by including GDP $\beta$ s in the recording pipette (**Fig. S4b**). To demonstrate  
188 the role of presynaptic A<sub>2A</sub>Rs in MC-GC LTP, we also employed a conditional knockout  
189 strategy combined with optogenetics which allow us to selectively activate A<sub>2A</sub>R-deficient  
190 MC axons expressing the fast opsin ChIEF (**Fig. 3e**). We found that presynaptic A<sub>2A</sub>R cKO  
191 abolished TBF-LTP (**Fig. 3f**). Taken together, these findings indicate that presynaptic but  
192 not postsynaptic A<sub>2A</sub>R activation was necessary for LTP at MC-GC synapses.

194 A<sub>2A</sub>Rs are likely activated by adenosine released from GCs during LTP induction. As  
195 adenosine can also target presynaptic adenosine type 1 receptors (A<sub>1</sub>Rs), G<sub>i/o</sub>-coupled  
196 receptors whose activation typically suppress neurotransmitter release, we therefore  
197 tested the role of A<sub>1</sub>Rs in this LTP. Indeed, the selective A<sub>1</sub>R antagonist DPCPX (100 nM)  
198 significantly increased MC-GC LTP magnitude (**Fig. 3g**), whereas it had no effect on basal  
199 transmission (**Fig. 3h**), indicating that A<sub>1</sub>Rs negatively control MC-GC LTP.

200

## 201 **Activation of presynaptic A<sub>2A</sub>Rs induces MC-GC LTP in a PKA-dependent manner**

202 Our results strongly suggest that MC terminals express functional A<sub>1</sub>Rs and A<sub>2A</sub>Rs (**Fig.**  
203 **3**). To directly assess this possibility, we performed immunoelectron microscopy.  
204 Immunoparticles for A<sub>1</sub>Rs were mainly found presynaptically in the molecular layer of the  
205 dentate gyrus at MC-GC and perforant path (PP)-GC synapses (**Fig. 4a-d**). Remarkably,  
206 using an anti-A<sub>2A</sub>R antibody previously validated in A<sub>2A</sub>R-deficient mice<sup>25</sup>, we found  
207 strong A<sub>2A</sub>R expression in the presynaptic membrane of asymmetric, putative MC-GC  
208 synapses in the IML (**Fig. 4e,f,h**) and very few particles postsynaptically (**Fig. 4e,f,h**). In  
209 contrast, a quasi-exclusive postsynaptic expression was detected at asymmetric PP-GC  
210 synapses (**Fig. 4g-h**).

211 We next tested whether A<sub>2A</sub>R activation was sufficient to induce LTP at MC-GC synapses.  
212 Bath application of the A<sub>2A</sub>R agonist CGS21680 (50 nM, 15 min) selectively enhanced MC  
213 but not MPP EPSC amplitude (**Fig. 5a**). This synapse-specific potentiation was associated  
214 with a significant decrease in both PPR and CV (**Fig. 5b**), suggesting a presynaptic  
215 mechanism of expression, and supporting a presynaptic location of A<sub>2A</sub>Rs. Adding the  
216 selective A<sub>2A</sub>R antagonist SCH 58261 (100 nM) during the washout of CGS21680 (50 nM)  
217 did not impair the long-lasting potentiation, whereas continuous bath application of SCH  
218 58261 (100 nM) abolished the CGS21680-induced potentiation (**Fig. 5c**). These results  
219 indicate that activation of A<sub>2A</sub>Rs was sufficient to induce LTP at MC-GC synapses.  
220 Because the A<sub>2A</sub>R is a G<sub>s</sub>-coupled receptor, we next tested whether CGS21680-induced  
221 LTP was PKA-dependent. Bath application of the selective, cell-permeant PKA inhibitor  
222 myristoylated PKI<sub>14-22</sub> (1 μM) abolished CGS21680-induced LTP, whereas loading the  
223 membrane-impermeant PKA inhibitor PKI<sub>6-22</sub> (2.5 μM) in GCs via the recording pipette had  
224 no effect (**Fig. 5d**). Thus, A<sub>2A</sub>Rs enhance glutamate release via presynaptic PKA  
225 activation, consistent with previous findings showing that PKA activity is necessary and  
226 sufficient for MC-GC LTP<sup>6</sup>.

227 Our results thus far indicate that both BDNF/TrkB and adenosine/A<sub>2A</sub>R signaling are  
228 involved in MC-GC LTP, and previous work demonstrated that A<sub>2A</sub>Rs facilitate BDNF  
229 signaling at some synapses<sup>17</sup>. We therefore sought to determine potential interactions  
230 between these signaling cascades at the MC-GC synapse. The TrkB antagonist ANA-12  
231 had no effect on CGS21680-induced LTP (**Fig. 5e**), whereas it blocked TBF-LTP in  
232 interleaved experiments (**Fig. 5f**; see also **Fig. S1b**). These findings, together with our  
233 previous results (**Fig. 3, 4**), strongly suggest that presynaptic adenosine/A<sub>2A</sub>R signaling  
234 mediates LTP downstream of BDNF/TrkB signaling.

235 MC axon terminals also express A<sub>1</sub>Rs (**Fig. 4**) whose activation could trigger presynaptic  
236 long-term depression<sup>26</sup>. However, bath application of the selective A<sub>1</sub>R agonist CCPA (50  
237 nM, 15 min) reduced both MC and MPP-mediated transmission reversibly as the reduction  
238 was washed out with the A<sub>1</sub>R antagonist DPCPX (100 nM) (**Fig. S5a**). This transient A<sub>1</sub>R-  
239 induced depression was associated with a reversible increase in both PPR and CV (**Fig.**  
240 **S5b,c**), suggesting a presynaptic mechanism. CCPA (50 nM, 15 min) failed to induce  
241 synaptic depression in the presence of DPCPX (100 nM) (**Fig. S5,d**). Thus, although both

242 A<sub>1</sub> and A<sub>2A</sub> receptors are expressed at MC axon terminals, only the latter engages long-  
243 lasting synaptic plasticity.

#### 244 **Passive adenosine release from GC is required for presynaptic MC-GC LTP**

245 Adenosine can be released from neurons upon activity<sup>20,22-24</sup> via equilibrative nucleoside  
246 transporters (ENTs)<sup>21</sup>. Our results strongly suggest that presynaptic A<sub>2A</sub>Rs are activated  
247 by endogenous adenosine during MC-GC LTP (**Fig. 3**). If adenosine is the retrograde  
248 signal, interfering with adenosine release selectively from GCs should impair LTP. As a  
249 first approach, we tested whether blocking ENTs can interfere with LTP induction. Bath  
250 application of the ENTs inhibitors dipyridamole (20 μM) and NBMPR (10 μM) abolished  
251 LTP (**Fig. 6a**) but did not affect basal MC-GC synaptic transmission (**Fig. 6b**). Because  
252 ENTs are also implicated in adenosine reuptake, bath application of the ENT blockers  
253 may significantly increase extracellular adenosine levels, which, by activating A<sub>2A</sub>Rs may  
254 potentiate MC-GC transmission and occlude LTP. The fact that ENT blockers had no  
255 effect on basal MC-GC synaptic transmission (**Fig. 6b**) could be due to simultaneous  
256 activation of A<sub>1</sub>R, which might mask any potential A<sub>2A</sub>R-mediated potentiation. To test this  
257 possibility, we bath applied both the ENT blockers and DPCPX (100 nM) to prevent a  
258 potential A<sub>1</sub>R-mediated depression of MC-GC synaptic transmission. We found that co-  
259 application of the ENT blockers and DPCPX (100 nM) increased MC-GC transmission,  
260 and this effect was abolished in the presence of the A<sub>2A</sub>R antagonist SCH 58261 (100 nM)  
261 (**Fig. 6c**). These results indicate that increasing the extracellular concentration of  
262 endogenous adenosine is sufficient to activate presynaptic A<sub>2A</sub>R and trigger MC-GC  
263 potentiation.

264 To avoid adenosine tonic activity due to extracellular accumulation, we employed a single-  
265 cell approach and selectively blocked ENTs in a single GC. Similarly to previous  
266 studies<sup>22,24</sup>, we loaded inosine (100 μM) intracellularly, a competitive blocker of adenosine  
267 efflux through ENTs<sup>21</sup>, *via* the recording pipette. We found that intracellular inosine  
268 abolished TBF-LTP (**Fig. 6d**), whereas bath application of 100 μM inosine had no effect  
269 on MC-GC synaptic transmission (**Fig. 6e**). Bath application of DPCPX increased MC  
270 EPSC amplitude when ENTs inhibitors were continuously bath applied but not when  
271 inosine (100 μM) was loaded in a single GC (**Fig. 6f**), confirming that intracellular inosine  
272 did not increase adenosine tone. Altogether these findings indicate that adenosine,  
273 passively released from GC through ENTs, likely acts as a retrograde messenger at MC-  
274 GC synapses.

#### 275 **Repetitive neuronal activity induces adenosine release via a BDNF/TrkB-dependent** 276 **mechanism**

277 To test whether adenosine is released during MC-GC LTP induction, we utilized the  
278 genetically encoded sensor for adenosine GRAB<sub>Ado1.0m</sub><sup>27</sup> selectively expressed in  
279 commissural MC axons (see Methods), and found a clear fluorescence signal in the  
280 contralateral IML (**Fig. 7a,b**). The MC BS protocol that triggers MC-GC LTP in acute  
281 hippocampal slices also induced a transient increase in the GRAB<sub>Ado1.0m</sub> signal. As  
282 expected<sup>27</sup>, this enhancement was abolished when the MC BS protocol was delivered in

283 the presence of the  $A_{2A}R$  antagonist SCH58261 (**Fig. 7b,c,f**). Consistent with  $A_{2A}R$   
284 signaling being engaged downstream of TrkB activation, we found no change in  
285 GRAB<sub>Ado1.0m</sub> fluorescence in the presence of the TrkB antagonist ANA-12 (15  $\mu$ M), and in  
286 postsynaptic *TrkB* cKO mice (**Fig. 7d,e,f**). Altogether these results demonstrate that MC  
287 repetitive activity releases adenosine in a postsynaptic TrkB-dependent manner.

288 Lastly, we aimed to determine whether neuronal activity induces adenosine release *in vivo*  
289 and the functional impact of such release. We recently found that MC-GC LTP can also  
290 be triggered by early epileptic activity induced with kainic acid (KA) intraperitoneal (i.p.)  
291 administration, and this LTP further promotes seizure activity<sup>8</sup>. Therefore, we  
292 hypothesized that epileptic activity should release adenosine, and interfering with  
293 adenosine/ $A_{2A}R$  signaling should reduce seizures. To test these predictions, we  
294 expressed GRAB<sub>Ado1.0m</sub> in commissural MC axons and recorded the fluorescence signals  
295 using fiber photometry in freely moving mice (**Fig. 8a,b**). We found a large increase in  
296 GRAB<sub>Ado1.0m</sub> fluorescence following i.p. injection of KA (**Fig. 8c,d**) but not saline (not  
297 shown). Moreover,  $A_{2A}R$  deletion from DG excitatory neurons, which blocked MC-GC LTP  
298 *in vitro* (**Fig. 3**), reduced KA-induced seizure susceptibility and severity (**Fig. 8e-i**).  
299 Altogether, these results not only demonstrate *in vivo* adenosine release following  
300 neuronal activity that occur during initial seizures, but strongly suggest that adenosine  
301 signaling promotes seizures via  $A_{2A}Rs$ .

302

## 303 **DISCUSSION (1,558 words)**

304  
305 In this study, we discovered a novel retrograde signaling mechanism that mediates  
306 presynaptic activity-dependent synaptic strengthening, at an important but long-  
307 overlooked hippocampal circuit (**Fig. S6**). Specifically, we found that repetitive firing of a  
308 single postsynaptic neuron was sufficient to trigger presynaptic LTP at MC-GC but not  
309 neighboring MPP synapses. We demonstrated that functional  $A_{2A}$  receptors are  
310 expressed at MC axon terminals but not at MPP axon terminals, and that  $A_{2A}R$  activation  
311 is necessary and sufficient to induce MC-GC LTP. During LTP induction GCs passively  
312 release adenosine through ENTs, in a postsynaptic TrkB- and activity-dependent manner.  
313 Moreover, we found that adenosine is released *in vivo* during initial seizures and  $A_{2A}R$   
314 cKO has an anti-epileptic effect. Our findings establish adenosine/ $A_{2A}R$  as a novel  
315 retrograde signaling mechanism not only relevant to synaptic plasticity but also to early  
316 epileptogenesis.

317

### 318 **GC TBF induces presynaptic LTP at MC-GC synapses**

319  
320 We previously showed that MC bursts of activity powerfully induce MC-GC LTP<sup>6</sup>. The  
321 present study revealed that direct activation of a single GC with physiologically relevant  
322 pattern of activity<sup>28-33</sup> was sufficient to induce presynaptic LTP at MC-GC synapses  
323 without changing the strength of MPP neighboring inputs. Against the possibility that this  
324 single cell-induced LTP could emerge from the activation of the recurrent GC-MC-GC  
325 circuit are the following two observations. First, GC TBF induced normal LTP even in



326 continuous presence of the selective group II mGluR agonist DCG IV, which abolishes  
327 GC-MC<sup>34,35</sup> but not MC-GC transmission<sup>12</sup>. Second, TBF LTP was normally induced at  
328 optogenetically activated synaptic inputs arising from contralateral MC axons that are  
329 separated from their cell bodies in hippocampal slices. Importantly, our results strongly  
330 suggest that GC TBF and synaptically (MC BS)-induced LTP share a common mechanism  
331 that involves postsynaptic BDNF/TrkB and presynaptic adenosine/A<sub>2A</sub>R and cAMP/PKA  
332 signaling. In addition, both potentiations are expressed presynaptically. We recently found  
333 that synaptically-induced MC-GC LTP requires BDNF release from GCs<sup>7</sup>. It is therefore  
334 likely that GC TBF induces LTP in part by releasing BDNF from the postsynaptic  
335 compartment. Consistent with this possibility, we now report that GC TBF-induced LTP  
336 requires both dendritic BDNF release via SNARE-dependent exocytosis as also reported  
337 in cortical neurons and hippocampal slices<sup>13,36</sup>.

### 338 339 **Adenosine is released from GC in an activity and TrkB-dependent manner**

340  
341 Using the genetically encoded adenosine sensor GRAB<sub>Ado1.0m</sub><sup>27</sup>, we detected a phasic  
342 increase in extracellular adenosine following both LTP induction *ex vivo* and during  
343 epileptic activity *in vivo*. Previous studies have shown that adenosine can be released  
344 from neurons upon activity via ENTs<sup>20-24</sup>. In support of this mechanism, we found that  
345 interfering with ENT-mediated release of adenosine from a single postsynaptic GC  
346 abolished MC-GC LTP, indicating that passive release of adenosine from GCs is crucial  
347 for this form of plasticity. However, we cannot discard a potential contribution of adenosine  
348 arising from ATP extracellular conversion<sup>37,38</sup> or from other cell types such as interneurons  
349 and glial cells<sup>20,39</sup>.

350  
351 Intracellular accumulation of adenosine can be the consequence of sequential  
352 dephosphorylation of ATP or the hydrolysis of S-adenosylho-mocysteine<sup>40</sup>. During MC-  
353 GC LTP induction, formation of intracellular adenosine in GCs likely results from robust  
354 postsynaptic TrkB activation, which presumably causes sequential dephosphorylation of  
355 ATP. In support of this scenario are the following observations. First, MC-GC LTP  
356 induction releases BDNF that activates TrkB receptors on GCs<sup>6,7</sup>. Second, activity-  
357 induced adenosine release in the IML is postsynaptic TrkB-dependent, as it is abolished  
358 in the presence of the TrkB selective antagonist ANA-12 and by genetically removing *TrkB*  
359 from GCs. Third, adenosine/A<sub>2A</sub>R signaling is engaged downstream of TrkB activation, as  
360 indicated by the fact that BDNF-induced LTP was abolished by A<sub>2A</sub>R antagonism, whereas  
361 TrkB antagonism had no effect on A<sub>2A</sub>R agonist-induced LTP. Lastly, adenosine acts via  
362 presynaptic A<sub>2A</sub>Rs, whereas BDNF activates postsynaptic TrkB<sup>6,7</sup>, discarding physical  
363 interaction or transactivation, a process whereby A<sub>2A</sub>R activation can induce TrkB  
364 phosphorylation in the absence of neurotrophins<sup>41</sup>.

365  
366 To our knowledge, we provide the first direct evidence that adenosine release can occur  
367 in a TrkB-dependent manner. Such a mechanism could explain, at least in part, BDNF  
368 and adenosine signaling interactions reported at other synapses in the brain. Several  
369 studies showed that activation of the G<sub>s</sub>-coupled A<sub>2A</sub>R and PKA are required for BDNF-  
370 induced facilitation of synaptic transmission and plasticity. Although such observations

371 have been extensively reported in the hippocampus<sup>17-19,42,43</sup>, the precise mechanism of  
372 this crosstalk remains elusive. Consistent with our findings at the hippocampal MC-GC  
373 synapse, BDNF-induced facilitation at the neuromuscular junction was abolished in  
374 presence of A<sub>2A</sub>R antagonists but also by PKA inhibitors, while A<sub>2A</sub>R agonist-induced  
375 increase in neurotransmitter release is TrkB-independent<sup>17,42,43</sup>. In conclusion, our  
376 findings support a model whereby neuronal activity releases adenosine in TrkB-dependent  
377 manner. Further work is required to determine the generalizability of this model in other  
378 brain areas and to identify the precise mechanisms whereby TrkB activation leads to  
379 adenosine release.

380

### 381 **Retrograde adenosine/A<sub>2A</sub>R cascade mediates presynaptic LTP at MC-GC** 382 **synapses**

383

384 Retrograde signaling is a common mechanism in presynaptic forms of long-term  
385 plasticity<sup>9</sup>. While several retrograde signals have been identified throughout the brain<sup>10</sup>;  
386 here we uncovered adenosine/A<sub>2A</sub>R as a novel form of retrograde signaling in the  
387 hippocampus. Single cell manipulations revealed that interfering with adenosine release  
388 from a single postsynaptic neuron completely abolished MC-GC LTP, induced by GC firing  
389 alone. Furthermore, by using pharmacology, A<sub>2A</sub>R presynaptic cKO and electron  
390 microscopy, we demonstrated that activation of presynaptic A<sub>2A</sub>R was necessary and  
391 sufficient for MC-GC LTP. However, we cannot discard potential role of other cell-types,  
392 including glial cells, as potential source or target of adenosine. Despite the relatively low  
393 expression levels of A<sub>2A</sub>R in the hippocampus<sup>44</sup>, previous work has demonstrated that  
394 A<sub>2A</sub>R signaling can regulate hippocampal synaptic plasticity<sup>45,46</sup>. To our knowledge, our  
395 study provides the first evidence that retrograde adenosine signaling can mediate  
396 presynaptic LTP. As Gs-coupled receptors, A<sub>2A</sub>R on MC axon terminals likely activate  
397 the cAMP/PKA cascade, and as for other forms of presynaptic LTP<sup>9</sup>, this activation  
398 engages a long-lasting increase of glutamate release whose downstream mechanism is  
399 poorly understood. Whether retrograde adenosine/A<sub>2A</sub>R signaling can mediate activity-  
400 dependent strengthening at other synapses in the brain remain to be investigated.

401

### 402 **Role of A<sub>1</sub>R in controlling MC-GC synaptic transmission and LTP**

403

404 As previously reported at other synapses<sup>42,47</sup>, our findings strongly suggest that  
405 endogenous adenosine simultaneously activate A<sub>1</sub>R and A<sub>2A</sub>R localized at MC terminals.  
406 While there is evidence that A<sub>1</sub>R and A<sub>2A</sub>R can localize at the same nerve terminal<sup>48</sup> and  
407 even form heteromers<sup>49</sup>, our results cannot deny or support these possibilities. The  
408 induction of MC-GC LTP was associated with a surge of extracellular adenosine that  
409 triggered LTP via A<sub>2A</sub>R activation, but dampened LTP via A<sub>1</sub>R activation. While A<sub>1</sub>R  
410 agonism transiently inhibited glutamate release, A<sub>2A</sub>R agonism increased glutamate  
411 release in a long-lasting manner. Consistent with these pharmacological observations, the  
412 net effect mediated by transient release of endogenous adenosine during LTP induction  
413 was a long-lasting enhancement of glutamate release. Similar A<sub>1</sub>R-mediated dampening  
414 of LTP has previously been observed at other synapses<sup>50,51</sup>. A possible explanation for  
415 this dampening is that presynaptic A<sub>1</sub>Rs, which are G<sub>i/o</sub>-coupled, decrease the level of

416 cAMP required for MC-GC LTP<sup>6</sup>. We recently reported that the type 1 cannabinoid  
417 receptor, another G<sub>i/o</sub>-coupled receptor that is highly expressed at MC axon terminals,  
418 also dampens MC-GC LTP<sup>14</sup>. Thus, the induction of this form of plasticity is tightly  
419 controlled by two distinct retrograde signals, adenosine and endocannabinoids, which by  
420 activating presynaptic G<sub>i/o</sub>-coupled receptors dampen LTP induction. In this way, both  
421 retrograde signals could prevent runaway activity of the MC-GC-MC recurrent excitatory  
422 circuit. Notably, we did not find any tonic regulation of basal transmission by A<sub>1</sub>R nor A<sub>2A</sub>R  
423 at MC-GC synapse.

## 424 425 **Physiological and pathological relevance of A<sub>2A</sub>R-mediated LTP in the dentate** 426 **gyrus** 427

428 Growing evidence indicates that MCs are critically involved in hippocampal-dependent  
429 learning<sup>2</sup>. For example, silencing MCs, selectively, impairs retrieval of spatial memory<sup>52</sup>  
430 and novelty-induced contextual memory acquisition<sup>53</sup>. MC-GC LTP is a robust form of  
431 presynaptic plasticity that can be elicited in vivo upon experience<sup>7</sup> and, by changing  
432 information flow in the DG<sup>6</sup>, it may contribute significantly to learning and memory. While  
433 GCs exhibit extremely sparse and selective firing in single place field<sup>30</sup>, we found that MC-  
434 GC LTP can be triggered by GC firing alone, suggesting that this plasticity could be  
435 implicated in experience-driven refinement of DG circuit and memory. Previous work  
436 indicates that adenosine/A<sub>2A</sub>R signaling may contribute to hippocampal-dependent  
437 memory<sup>46,49</sup>. Our findings demonstrating a key role for adenosine/A<sub>2A</sub>R signaling in MC-  
438 GC LTP could explain, at least in part, memory impairments found in both A<sub>2A</sub>R  
439 antagonist-injected animals<sup>54</sup> and hippocampal A<sub>2A</sub>R cKO<sup>55</sup>. Demonstrating the precise  
440 role of adenosine/A<sub>2A</sub>R retrograde signaling at MC-GC synapses will necessitate selective  
441 manipulation of A<sub>2A</sub>R at MC axon terminals, a task requiring tools that are not currently  
442 available.

443  
444 Adenosinergic signaling is critically involved in epilepsy<sup>56</sup>. Global A<sub>2A</sub>R genetic deletion  
445 and selective A<sub>2A</sub>R antagonism attenuates both seizures progression<sup>57,58</sup> and seizures-  
446 induced neuronal damage<sup>59-61</sup>, whereas A<sub>2A</sub>R activation lowers seizures' threshold<sup>62</sup>. In  
447 addition, decreased A<sub>1</sub>R signaling and increased A<sub>2A</sub>R<sup>63</sup> and BDNF/TrkB signaling<sup>64</sup> occurs  
448 in epilepsy. Remarkably, we found that MC-GC LTP required TrkB-dependent  
449 adenosine/A<sub>2A</sub>R signaling while its induction was negatively regulated by adenosine A<sub>1</sub>R  
450 activity. Although the precise mechanism by which A<sub>2A</sub>R participate in temporal lobe  
451 epilepsy is poorly understood, presynaptic A<sub>2A</sub>R at MC axons may explain, at least in  
452 part, the pro-epileptic role of A<sub>2A</sub>R and the antiepileptic role of A<sub>1</sub>R. This notion is  
453 consistent with our recent work demonstrating that initial seizures trigger MC-GC LTP  
454 broadly in the DG and that uncontrolled LTP is sufficient to promote subsequent seizures<sup>8</sup>.  
455 Our new study demonstrating adenosine/A<sub>2A</sub>R-dependent strengthening of MC-GC  
456 synapses provides not only a novel mechanism whereby MC activity may contribute to  
457 early stages of temporal lobe epilepsy<sup>2,5,8,65</sup>, but also highlights a potential target for the  
458 treatment of this disorder.

459  
460

461 **METHODS**

462

463 **Experimental Model and Subject Details**

464 Sprague-Dawley rats P19-P30 and P50-P70 C57BL/6, floxed TrkB (*TrkB<sup>fl/fl</sup>*), floxed BDNF  
465 (*Bdnf<sup>fl/fl</sup>*) and floxed A<sub>2A</sub>R (*A<sub>2A</sub>R<sup>fl/fl</sup>*) mice were used. Males and females were equally used.  
466 All animals were group housed in a standard 12 hr light/12 hr dark cycle and had free  
467 access to food and water. Animal handling and use followed a protocol approved by the  
468 Institutional Animal Care and Use Committee of Albert Einstein College of Medicine, in  
469 accordance with the National Institutes of Health guidelines. *TrkB<sup>fl/fl</sup>* and *Bdnf<sup>fl/fl</sup>* mice  
470 generated by Dr. Luis Parada, were kindly donated by Dr. Lisa Monteggia (University of  
471 Texas, Southwestern Medical Center). *Adora2<sup>fl/fl</sup>* were obtained from Jackson Laboratory  
472 (B6;129-Adora2atm1Dyj/J, Jax 010687).

473

474 **Hippocampal slice preparation**

475 Acute transverse hippocampal slices were prepared from Sprague-Dawley rats (400 μm  
476 thick) and mice (300-μm thick). Animals were anesthetized with isoflurane and  
477 euthanized in accordance with institutional regulations. The hippocampi were then  
478 removed and cut using a VT1200s microslicer (Leica Microsystems Co.) in a cutting  
479 solution. Hippocampal slices from rats were prepared using a cutting solution containing  
480 (in mM): 215 sucrose, 2.5 KCl, 26 NaHCO<sub>3</sub>, 1.6 NaH<sub>2</sub>PO<sub>4</sub>, 1 CaCl<sub>2</sub>, 4 MgCl<sub>2</sub>, 4 MgSO<sub>4</sub>  
481 and 20 D-glucose. 30 min post-sectioning, the cutting medium was gradually switched to  
482 extracellular artificial cerebrospinal (ACSF) recording solution containing (in mM): 124  
483 NaCl, 2.5 KCl, 26 NaHCO<sub>3</sub>, 1 NaH<sub>2</sub>PO<sub>4</sub>, 2.5 CaCl<sub>2</sub>, 1.3 MgSO<sub>4</sub> and 10 D-glucose. Slices  
484 were incubated for at least 40 min in the ACSF solution before recording. Mouse  
485 hippocampal slices were prepared using a NMDG-based cutting solution containing (in  
486 mM): 93 N-Methyl-d-glucamin, 2.5 KCl, 1.25 NaH<sub>2</sub>PO<sub>4</sub>, 30 NaHCO<sub>3</sub>, 20 HEPES, 25 D-  
487 glucose, 2 Thiourea, 5 Na-Ascorbate, 3 Na-Pyruvate, 0.5 CaCl<sub>2</sub>, 10 MgCl<sub>2</sub>. These slices  
488 were then transferred to 32°C ACSF for 30 min and then kept at room temperature for at  
489 least 1h before recording. All solutions were equilibrated with 95% O<sub>2</sub> and 5% CO<sub>2</sub> (pH  
490 7.4).

491

492 **Electrophysiology**

493 Recordings were performed at 28 ± 1°C, otherwise stated, in a submersion-type recording  
494 chamber perfused at 2 mL/min with ACSF supplemented with the GABA<sub>A</sub> and the GABA<sub>B</sub>  
495 receptor antagonists, picrotoxin (100 μM) and CGP55845 hydrochloride (3 μM). Whole-  
496 cell patch-clamp recordings using a Multiclamp 700A amplifier (Molecular Devices) were  
497 obtained from GCs voltage clamped at -60 mV using patch-type pipette electrodes (~3-4  
498 MΩ) containing (in mM): 135 KMeSO<sub>4</sub>, 5 KCl, 1 CaCl<sub>2</sub>, 5 NaOH, 10 HEPES, 5 MgATP,  
499 0.4 Na<sub>3</sub>GTP, 5 EGTA and 10 D-glucose, pH 7.2 (288-291 mOsm). For IPSC recording in  
500 CA1, whole cell voltage clamp recordings were obtained from CA1 pyramidal neurons  
501 voltage clamped at V<sub>h</sub> = 10 mV using a cesium-based internal solution containing (in mM):  
502 131 cesium gluconate, 8 NaCl, 1 CaCl<sub>2</sub>, 10 EGTA, 10 D-glucose and 10 HEPES, pH 7.2  
503 (285-290 mOsm). IPSCs were evoked using an electrical stimulating pipette placed in CA1  
504 *stratum radiatum*, and recordings were performed in the continuous presence of ionotropic  
505 glutamate receptor antagonists NBQX (10 μM) and D-APV (50 μM). LTD of inhibitory

506 inputs onto CA1 pyramidal neurons (iLTD) was induced using theta burst-stimulation  
507 protocol (TBS, 10 bursts at 5 Hz of 5 pulses at 100 Hz, repeated every 5 s, 4 times). Series  
508 resistance (~6-25 M $\Omega$ ) was monitored throughout all experiments with a -5 mV, 80 ms  
509 voltage step, and cells that exhibited a significant change in series resistance (> 15%)  
510 were excluded from analysis. Botox experiments were performed at 32 °C. Botox was  
511 supplemented with 5 mM dithiothreitol (DTT) in the intracellular solution, and interleaved  
512 control experiments included DTT only.

513  
514 A broken tip (~10–20  $\mu$ m) stimulating patch-type micropipette filled with ACSF was placed  
515 in the inner molecular layer (IML, < 50  $\mu$ m from the border of the GC body layer) to activate  
516 MC axons, and in the middle third of the molecular layer to activate MPP inputs. To elicit  
517 synaptic responses, paired, monopolar square-wave voltage or current pulses (100–200  
518  $\mu$ s pulse width, 4–27 V) were delivered through a stimulus isolator (Digitimer DS2A-MKII).  
519 Typically, stimulation intensity was adjusted to obtain synaptic responses comparable in  
520 amplitude across experiments; e.g., 30–70 pA EPSCs ( $V_h$  -60 mV). For the optogenetic  
521 experiments, EPSCs were evoked using 1–3 ms pulses of blue (470-nm) light, provided  
522 by a collimated LED (Thorlabs, M470L3-C5, 470 nm, 300mW) and delivered through the  
523 microscope objective (40X, 0.8 NA). GC TBF-induced LTP was typically induced with 10  
524 bursts at 5 Hz of 5 AP at 50 Hz, repeated 4 times every 5s, while the membrane potential  
525 was held at -60 mV in current clamp. Extracellular field recordings were performed using  
526 patch-type pipettes filled with 1M NaCl, placed in CA1 *stratum radiatum*. fESPS were  
527 evoked with an ACSF-containing broken tip patch pipette in CA1 *stratum radiatum*. LTP  
528 at CA3-CA1 synapses, was triggered using high frequency stimulation protocol (4 HFS:  
529 100 pulses at 100 Hz repeated 4 times every 10 s) and recordings were performed at 25  
530  $\pm$  1°C. LTD was induced with low frequency stimulation protocol (LFS: 900 pulses at 1  
531 Hz).

532  
533 Electrophysiological data were acquired at 5 kHz, filtered at 2.4 kHz, and analyzed using  
534 custom-made software for IgorPro (Wavemetrics Inc.). Paired-pulse ratio (PPR) was  
535 defined as the ratio of the amplitude of the second EPSC (baseline taken 1–2 ms before  
536 the stimulus artifact) to the amplitude of the first EPSC. Coefficient of variation (CV) was  
537 calculated as the standard deviation of EPSC amplitude divided by mean EPSC  
538 amplitude. Both PPR and CV were measured 10 min before and 20–30 min after LTP  
539 induction protocol or CGS21680-induced potentiation. The magnitude of LTP/LTD was  
540 determined by comparing 10 min baseline responses with responses 20–30 min (or 30–40  
541 min for **Fig. 1b**, 40–50 min for **Fig. 2b**, 45–55 min for **Fig. 2d**) after induction protocol.  
542 Averaged traces include 20 consecutive individual responses.

543  
544 **Postsynaptic TrkB and BDNF conditional KO**  
545 Adeno-associated virus AAV<sub>5</sub>.CamKII.eGFP (control virus) or AAV<sub>5</sub>.CamKII.GFP-CRE  
546 (University of Pennsylvania Vector Core) was injected (1  $\mu$ L at a flow rate of 0.1  $\mu$ L/min)  
547 unilaterally into the dorsal blade of the dentate gyrus (2.06 mm posterior to bregma, 1.5  
548 mm lateral to bregma, 1.8 mm ventral from dura) of *TrkB<sup>fl/fl</sup>* or *Bdnf<sup>fl/fl</sup>* mice (4–5 week old).  
549 Animals were placed in a stereotaxic frame and anesthetized with isoflurane (up to 5% for

550 induction and 1%–3% for maintenance). Both male and female mice were used with a  
551 similar ratio for the two types of viruses. Slices for electrophysiology were prepared from  
552 injected animals 3–5 weeks after injection. For each animal, the absence of GFP-  
553 expressing cells in the hilus of the entire ipsilateral hippocampus was verified.

554  
555 **Presynaptic TrkB and A<sub>2A</sub>R conditional KO**  
556 A mix with (1:2 ratio, 1.2 μL at 0.1 μL/min) of Cre recombinase-containing AAV  
557 (AAV<sub>5</sub>.CamKII.Cre-mCherry, UNC Vector) and Cre-dependent ChIEF  
558 (AAV<sub>DJ</sub>.Flx.ChIEF.Tdtomato) was injected into the dentate gyrus (relative to bregma: 1.9  
559 mm posterior, 1.25 mm lateral, 2.3 ventral) of adult *TrkB<sup>fl/fl</sup>*, *A<sub>2A</sub>R<sup>fl/fl</sup>* or WT control mice (4-  
560 5 week old). We then performed electrophysiology experiments 4–5 weeks post-injection  
561 in contralateral hippocampal slices. This allowed us to optically activate Cre-expressing  
562 MC axons.

563  
564 **Pharmacology**  
565 Reagents were bath applied following dilution into ACSF from stock solutions stored at  
566 –20°C prepared in water, DMSO or ethanol, depending on the manufacturer’s  
567 recommendation. BDNF puffs (8 nM, 2.5-3 PSI, 3 s puffs repeated twice, 5 s interval) were  
568 applied using a Picospritzer III (Parker) connected to a broken patch pipette. The tip of the  
569 puffer pipette was positioned above the IML while monitoring MC-GC transmission. For  
570 experiments requiring postsynaptic loading PKI<sub>6-22</sub>, LTP was induced at least 20 min after  
571 establishing the whole-cell configuration. Time of LTP induction protocol was matched in  
572 interleaved controls.

573  
574 **Electron Microscopy**  
575 Animal care and handling prior to and during the experimental procedures were in  
576 accordance with Spanish (RD 1201/2005) and European Union (86/609/EC) regulations,  
577 and the protocols were approved by the University’s Animal Care and Use Committee.  
578 Mice were anesthetized by intraperitoneal injection of ketamine/xylazine (ratio 1:1, 0.1  
579 mL/kg) and transcardially perfused with ice-cold fixative containing 4% paraformaldehyde,  
580 with 0.05% glutaraldehyde and 15% (v/v) saturated picric acid made up in 0.1 M  
581 phosphate buffer (PB, pH 7.4). Brains were then removed and immersed in the same  
582 fixative for 2 hours or overnight at 4°C. Tissue blocks were washed thoroughly in 0.1 M  
583 PB. Coronal sections (60-μm thick) were cut using a vibratome (Leica V1000). Pre-  
584 embedding immunohistochemical analyses was performed as described previously<sup>66</sup>.  
585 Free-floating sections were incubated in 10% (v/v) NGS diluted in TBS. Sections were  
586 then incubated in, 3-5 μg/mL diluted in TBS containing 1% (v/v) NGS, anti-A<sub>2A</sub>R [guinea  
587 pig anti-A<sub>2A</sub>R polyclonal (AB\_2571656; Frontier Institute co., Japan)] or anti-A<sub>1</sub>R [rabbit-  
588 anti-A<sub>1</sub>R antibody (2 mg/ml; Affinity Bioreagents, Labome, USA)] antibodies, followed by  
589 incubation in goat anti-guinea pig IgG coupled to 1.4 nm gold or in goat anti-rabbit IgG  
590 coupled to 1.4 nm gold (Nanoprobes Inc., Stony Brook, NY, USA), respectively. Sections  
591 were postfixed in 1% (v/v) glutaraldehyde and washed in double-distilled water, followed  
592 by silver enhancement of the gold particles with an HQ Silver kit (Nanoprobes Inc.).  
593 Sections were then treated with osmium tetroxide (1% in 0.1 m phosphate buffer), block-  
594 stained with uranyl acetate, dehydrated in graded series of ethanol and flat-embedded on

595 glass slides in Durcupan (Fluka) resin. Regions of interest were cut at 70-90 nm on an  
596 ultramicrotome (Reichert Ultracut E, Leica, Austria) and collected on single slot pioloform-  
597 coated copper grids. Staining was performed on drops of 1% aqueous uranyl acetate  
598 followed by Reynolds's lead citrate. Ultrastructural analyses were performed in a Jeol-  
599 1010 electron microscope. Quantitative analysis of the relative abundance of A<sub>2A</sub>R or A<sub>1</sub>R,  
600 in the molecular layer of the dentate gyrus, was performed from 60 μm coronal slices as  
601 described<sup>66</sup>, in the area for MC-GC synapses and the area of PP-GC synapses. For each  
602 of three animals, three samples of tissue were obtained (nine total blocks). Electron  
603 microscopic serial ultrathin sections were cut close to the surface of each block because  
604 immunoreactivity decreased with depth. Randomly selected areas were captured at a final  
605 magnification of 45,000X, and measurements covered a total section area of ~5000 μm<sup>2</sup>.  
606 Dendritic shafts, dendritic spines and axon terminals were assessed for the presence of  
607 immunoparticles. The percentage of immunoparticles for A<sub>2A</sub>R or for A<sub>1</sub>R at  
608 postsynaptic and presynaptic sites was calculated. To establish the relative frequency of  
609 A<sub>2A</sub>R in axon terminals, immunoparticles identified in this compartment were counted. The  
610 perimeter of each axon terminal was measured in reference areas totaling ~2,000 μm<sup>2</sup>.  
611 All axon terminals establishing excitatory synapses were counted and assessed from  
612 single ultrathin sections.

613  
614 **Two-photon live imaging of GRAB<sub>Ado</sub> in acute hippocampal slices**  
615 AAV<sub>9</sub>.hSyn.GRAB.Ado1.0m (WZ Biosciences Inc) was injected (1 μL at 0.1 μL/min)  
616 unilaterally into the hilus of WT mice or *TrkB<sup>fl/fl</sup>* mice (3 - 4 week old). Slices were prepared  
617 3 - 4 weeks post-injection and expression of GRAB<sub>Ado1.0m</sub> was confirmed in MCs of the  
618 ipsilateral hippocampus for each injected mouse. Hippocampal slices from GRAB<sub>Ado1.0m</sub>-  
619 injected mice were prepared using an ice-cold dissection buffer maintained in 5%  
620 CO<sub>2</sub>/95% O<sub>2</sub> and containing (in mM): 25 NaHCO<sub>3</sub>, 1.25 NaH<sub>2</sub>PO<sub>4</sub>, 2.5 KCl, 0.5 CaCl<sub>2</sub>, 7  
621 MgCl<sub>2</sub>, 25 D-glucose, 110 choline chloride, 11.6 ascorbic acid, 3.1 pyruvic acid. Slices  
622 were transferred to 32°C ACSF for 30 min and kept at room temperature for at least 45  
623 min before imaging. Slices were then transferred to an imaging chamber under an Ultima  
624 2-photon microscope (Bruker Corp.) equipped with a 60X NA 1.0 water-immersion  
625 objective and InSight DeepSee laser (Spectra-Physics). A 920-nm laser was used to  
626 excite GRAB<sub>Ado1.0m</sub>, and the emission signal was acquired using a 525–570 nm band-pass  
627 filter. The field of view (512 x 512 pixels per frame) was chosen in the IML of contralateral  
628 hippocampal slices where MC commissural axons projected onto GCs and expressed  
629 GRAB<sub>Ado1.0m</sub>. A broken tip stimulating patch-type micropipette filled with ACSF was  
630 positioned in the IML ~150 μm from the imaging region to activate MC axons. The region  
631 of interest (ROI) was magnified to 2X and at least 40 consecutive images (at 0.25 Hz) as  
632 a baseline using a PrairieView 5.4 (Bruker Corp.). Following baseline acquisition, MC  
633 burst stimulation was applied and at least additional 100 images (at 0.25 Hz). To verify  
634 reactivity of the ROI adenosine (100 μM) was added at the end of the imaging session.  
635 The fluorescence intensity of the ROI was measured and the ΔF/F<sub>0</sub> of  
636 the GRAB<sub>Ado1.0m</sub> signal was calculated using ImageJ software. All recordings were  
637 performed at 28 ± 1°C in a submersion-type recording chamber perfused at 2 mL/min with  
638 ACSF.  
639

## 640 **Seizure induction and monitoring**

641 Epileptic seizures were induced acutely in 2-3-month-old mice. Intraperitoneal (IP)  
642 injection of 20-30 mg/kg of kainic acid (KA, HelloBio HB0355) prepared in saline solution  
643 the same day were performed. For behavioral seizure scoring, mice were monitored  
644 during 120 min post-injection and behavioral seizures were scored, by an experimenter  
645 blind to condition (control vs A<sub>2A</sub>R cKO), using a modified Racine scale as follows: stage  
646 0: normal behavior, stage 1: immobility and rigidity, stage 2: head bobbing, stage 3:  
647 forelimb clonus and rearing, stage 4: continuous rearing and falling, stage 5: clonic-tonic  
648 seizure, stage 6: death. The maximum Racine score was recorded every 10 minutes and  
649 the cumulative seizure score was obtained by summing these scores across all 12 bins of  
650 the 120 min experiment.

## 651 **Fiber photometry in freely behaving mice**

652 AAV<sub>9</sub>.hSyn.GRAB.Ado1.0m (1.2  $\mu$ L at 0.1  $\mu$ L/min) was unilaterally injected into the DG  
653 (relative to bregma: 1.9 mm posterior, 1.25 mm lateral, 2.3 ventral) of WT mice (5-6 week  
654 old). An optic fiber (200  $\mu$ m diameter, NA = 0.37, Neurophotometrics) was implanted  
655 unilaterally, into the contralateral DG above the IML (relative to bregma: 1.9 mm posterior,  
656 1.25 mm lateral, 1.8 mm ventral) to record GRAB<sub>Ado1.0m</sub> fluorescence *in vivo*. 3-5 weeks  
657 after surgery, the fluorescence signal was monitored before and after KA IP injection (30  
658 mg/kg). To record GRAB<sub>Ado1.0m</sub> fluorescence, a three-channel multi-fiber photometry  
659 system (Neurophotometrics v1 Ltd) was used. 470 nm and 415 nm out of phase excitation  
660 lights were bandpass filtered and directed via a 20X objective (power: 30  $\mu$ W). A single  
661 patch cord connected to the optic fiber implant was used to deliver light and collect the  
662 emitted fluorescence, which was filtered, and projected on a CMOS camera sensor. The  
663 open-source software Bonsai was used for data acquisition (40 frames/s rate). The  
664 fluorescence intensity profile of each channel was calculated as the mean pixel value of  
665 the region of interest. To calculate  $\Delta F/F_0$ , the 470 nm-evoked signal was normalized by the  
666 isosbestic signal (415 nm) to correct for photobleaching and potential artefacts.  $F_0$   
667 corresponds to the average of the last three-minute (baseline) before KA injection.  
668

## 669 **Post-hoc analysis of AAV expression and optic fiber location**

670 Viral expression and optic fiber location were verified *post hoc*, at the end of the  
671 experiments (**Fig. 8**). Mice were anesthetized with isoflurane (3-5%) and transcardially  
672 perfused with 4% paraformaldehyde (PFA) in 0.1 M sodium phosphate buffer (PBS). 50  
673  $\mu$ m-thick brain coronal sections were prepared using a DSK Microslicer (DTK-1000),  
674 stained with DAPI (1:1000) to label cell nuclei, and mounted with Prolong diamond  
675 antifade reagent montant (ThermoFisher) onto microscope slides. Zeiss LSM 880  
676 Airyscan Confocal microscope with Super-Resolution and ZEN (black edition) software  
677 and a 25X oil-immersion objective were used for images acquisition.  
678

## 679 **Quantification and Statistical Analysis**

680 The normality of distributions was assessed using the Shapiro-Wilk test. In normal  
681 distributions, Student's unpaired and paired two-tailed t tests were used to assess  
682 between-group and within-group differences, respectively. One way ANOVA and One way  
683 ANOVA repeated measure (RM) were used when more than two groups were compared.  
684



685 The non-parametric paired sample Wilcoxon signed rank test and Mann-Whitney's U test  
686 were used in non-normal distributions. Statistical significance was set to  $p < 0.05$  (\*\*\*)  
687 indicates  $p < 0.001$ , \*\* indicates  $p < 0.01$ , and \* indicates  $p < 0.05$ ). All values are reported  
688 as the mean  $\pm$  SEM. Statistical results are summarized in **Table S1**. All experiments  
689 included at least three animals per condition. Statistical analysis was performed using  
690 OriginPro software (OriginLab).

691  
692  
693

### 694 **Acknowledgments**

695 We thank all the Castillo lab members for their invaluable feedback; Dr. Anita Autry Lab (Einstein)  
696 for sharing their photometry system and for technical support, especially to Ilaria Carta and Dr.  
697 Giovanni Podda; Subrina Persaud for assisting with confocal image acquisition; and Yulong Li  
698 (Peking University) for helpful discussions about the adenosine sensor. This work was supported  
699 by NIH grants R01 MH116673, R01MH125772, and R01 NS 113600 to P.E.C.. K.N. was partially  
700 supported by a Postdoctoral Research Fellowship (American Epilepsy Society), the Fondation  
701 pour la Recherche Médicale (postdoctoral fellowship for research abroad) and the Fondation  
702 Bettencourt Schueller (Prix pour les Jeunes Chercheurs 2016). Y.H. was supported by the Japan  
703 Society for the Promotion of Science postdoctoral fellowships for research abroad (H23.829).  
704 A.E.C. was partially supported by a Ruth L. Kirschstein Award (F32 NS071821), a NARSAD Young  
705 Investigator Grant from the Brain & Behavior Research Foundation, and by Chilean Fondecyt  
706 regular (#1201848). M.G. was supported by a Ruth L. Kirschstein (F31MH122134). R.L. was  
707 funded by the Spanish Ministerio de Economía y Competitividad (RTI2018-095812-B-I00) and  
708 Junta de Comunidades de Castilla-La Mancha (SBPLY/17/180501/000229). Confocal images  
709 were obtained at the Einstein Imaging Core (supported by The Rose F Kennedy Intellectual  
710 Disabilities Research Center - shared instrument grant 1S10OD25295 to Konstantin Dobrenis).

711  
712

### 712 **Conflict of interest**

713 Authors declare no conflict of interest.

714  
715

### 715 **Author contributions**

716 K.N. and P.E.C. designed studies and wrote the manuscript. K.N. performed experiments and  
717 analyzed all data except for the *in vitro* adenosine measurements that were designed, performed,  
718 and analyzed by C.B.. R.L. performed and analyzed immunoelectron microscopy experiments.  
719 M.G. tested the role of A1 receptors. Y.H and A.C designed, performed, and analyzed early  
720 experiments assessing conventional retrograde signals. All authors read and edited the  
721 manuscript.

722

723 **REFERENCES**

- 724
- 725 1 Lisman, J. E. Relating hippocampal circuitry to function: recall of memory sequences by  
726 reciprocal dentate-CA3 interactions. *Neuron* **22**, 233-242, doi:10.1016/s0896-  
727 6273(00)81085-5 (1999).
- 728 2 Scharfman, H. E. The enigmatic mossy cell of the dentate gyrus. *Nat Rev Neurosci* **17**,  
729 562-575, doi:10.1038/nrn.2016.87 (2016).
- 730 3 Jinde, S., Zsiros, V. & Nakazawa, K. Hilar mossy cell circuitry controlling dentate granule  
731 cell excitability. *Front Neural Circuits* **7**, 14, doi:10.3389/fncir.2013.00014 (2013).
- 732 4 Scharfman, H. E. & Myers, C. E. Hilar mossy cells of the dentate gyrus: a historical  
733 perspective. *Front Neural Circuits* **6**, 106, doi:10.3389/fncir.2012.00106 (2012).
- 734 5 Ratzliff, A., Santhakumar, V., Howard, A. & Soltesz, I. Mossy cells in epilepsy: rigor mortis  
735 or vigor mortis? *Trends Neurosci* **25**, 140-144, doi:10.1016/s0166-2236(00)02122-6  
736 (2002).
- 737 6 Hashimoto-dani, Y. *et al.* LTP at Hilar Mossy Cell-Dentate Granule Cell Synapses  
738 Modulates Dentate Gyrus Output by Increasing Excitation/Inhibition Balance. *Neuron* **95**,  
739 928-943 e923, doi:10.1016/j.neuron.2017.07.028 (2017).
- 740 7 Berthoux, C., Nasrallah, K. & Castillo, P. E. BDNF-induced BDNF release mediates long-  
741 term potentiation (*in preparation*) (2021).
- 742 8 Nasrallah, K. *et al.* Activity-dependent LTP in the dentate gyrus promotes epileptic  
743 seizures. <https://www.biorxiv.org/content/10.1101/2021.06.30.450628v1> (2021).
- 744 9 Castillo, P. E. Presynaptic LTP and LTD of excitatory and inhibitory synapses. *Cold Spring*  
745 *Harb Perspect Biol* **4**, doi:10.1101/cshperspect.a005728 (2012).
- 746 10 Regehr, W. G., Carey, M. R. & Best, A. R. Activity-dependent regulation of synapses by  
747 retrograde messengers. *Neuron* **63**, 154-170, doi:10.1016/j.neuron.2009.06.021 (2009).
- 748 11 Younts, T. J., Chevaleyre, V. & Castillo, P. E. CA1 pyramidal cell theta-burst firing triggers  
749 endocannabinoid-mediated long-term depression at both somatic and dendritic  
750 inhibitory synapses. *J Neurosci* **33**, 13743-13757, doi:10.1523/JNEUROSCI.0817-13.2013  
751 (2013).
- 752 12 Chiu, C. Q. & Castillo, P. E. Input-specific plasticity at excitatory synapses mediated by  
753 endocannabinoids in the dentate gyrus. *Neuropharmacology* **54**, 68-78,  
754 doi:10.1016/j.neuropharm.2007.06.026 (2008).
- 755 13 Shimojo, M. *et al.* SNAREs Controlling Vesicular Release of BDNF and Development of  
756 Callosal Axons. *Cell Rep* **11**, 1054-1066, doi:10.1016/j.celrep.2015.04.032 (2015).
- 757 14 Jensen, K. R., Berthoux, C., Nasrallah, K. & Castillo, P. E. Multiple cannabinoid signaling  
758 cascades powerfully suppress recurrent excitation in the hippocampus. *Proc Natl Acad*  
759 *Sci U S A* **118**, doi:10.1073/pnas.2017590118 (2021).
- 760 15 Williams, J. H. *et al.* The suppression of long-term potentiation in rat hippocampus by  
761 inhibitors of nitric oxide synthase is temperature and age dependent. *Neuron* **11**, 877-  
762 884, doi:10.1016/0896-6273(93)90117-a (1993).
- 763 16 Chevaleyre, V. & Castillo, P. E. Heterosynaptic LTD of hippocampal GABAergic synapses: a  
764 novel role of endocannabinoids in regulating excitability. *Neuron* **38**, 461-472,  
765 doi:10.1016/s0896-6273(03)00235-6 (2003).

- 766 17 Sebastiao, A. M. & Ribeiro, J. A. Triggering neurotrophic factor actions through  
767 adenosine A2A receptor activation: implications for neuroprotection. *Br J Pharmacol*  
768 **158**, 15-22, doi:10.1111/j.1476-5381.2009.00157.x (2009).
- 769 18 Diogenes, M. J., Fernandes, C. C., Sebastiao, A. M. & Ribeiro, J. A. Activation of adenosine  
770 A2A receptor facilitates brain-derived neurotrophic factor modulation of synaptic  
771 transmission in hippocampal slices. *J Neurosci* **24**, 2905-2913,  
772 doi:10.1523/JNEUROSCI.4454-03.2004 (2004).
- 773 19 Fontinha, B. M., Diogenes, M. J., Ribeiro, J. A. & Sebastiao, A. M. Enhancement of long-  
774 term potentiation by brain-derived neurotrophic factor requires adenosine A2A receptor  
775 activation by endogenous adenosine. *Neuropharmacology* **54**, 924-933,  
776 doi:10.1016/j.neuropharm.2008.01.011 (2008).
- 777 20 Latini, S. & Pedata, F. Adenosine in the central nervous system: release mechanisms and  
778 extracellular concentrations. *J Neurochem* **79**, 463-484, doi:10.1046/j.1471-  
779 4159.2001.00607.x (2001).
- 780 21 King, A. E., Ackley, M. A., Cass, C. E., Young, J. D. & Baldwin, S. A. Nucleoside  
781 transporters: from scavengers to novel therapeutic targets. *Trends Pharmacol Sci* **27**,  
782 416-425, doi:10.1016/j.tips.2006.06.004 (2006).
- 783 22 Lovatt, D. *et al.* Neuronal adenosine release, and not astrocytic ATP release, mediates  
784 feedback inhibition of excitatory activity. *Proc Natl Acad Sci U S A* **109**, 6265-6270,  
785 doi:10.1073/pnas.1120997109 (2012).
- 786 23 Wall, M. J. & Dale, N. Neuronal transporter and astrocytic ATP exocytosis underlie  
787 activity-dependent adenosine release in the hippocampus. *J Physiol* **591**, 3853-3871,  
788 doi:10.1113/jphysiol.2013.253450 (2013).
- 789 24 Pons-Bennaceur, A. *et al.* Diadenosine-Polyphosphate Analogue AppCH2ppA Suppresses  
790 Seizures by Enhancing Adenosine Signaling in the Cortex. *Cereb Cortex* **29**, 3778-3795,  
791 doi:10.1093/cercor/bhy257 (2019).
- 792 25 Rebola, N., Lujan, R., Cunha, R. A. & Mulle, C. Adenosine A2A receptors are essential for  
793 long-term potentiation of NMDA-EPSCs at hippocampal mossy fiber synapses. *Neuron*  
794 **57**, 121-134, doi:10.1016/j.neuron.2007.11.023 (2008).
- 795 26 Atwood, B. K., Lovinger, D. M. & Mathur, B. N. Presynaptic long-term depression  
796 mediated by Gi/o-coupled receptors. *Trends Neurosci* **37**, 663-673,  
797 doi:10.1016/j.tins.2014.07.010 (2014).
- 798 27 Peng, W. *et al.* Regulation of sleep homeostasis mediator adenosine by basal forebrain  
799 glutamatergic neurons. *Science* **369**, doi:10.1126/science.abb0556 (2020).
- 800 28 Henze, D. A., Wittner, L. & Buzsaki, G. Single granule cells reliably discharge targets in the  
801 hippocampal CA3 network in vivo. *Nat Neurosci* **5**, 790-795, doi:10.1038/nn887 (2002).
- 802 29 Pernia-Andrade, A. J. & Jonas, P. Theta-gamma-modulated synaptic currents in  
803 hippocampal granule cells in vivo define a mechanism for network oscillations. *Neuron*  
804 **81**, 140-152, doi:10.1016/j.neuron.2013.09.046 (2014).
- 805 30 Diamantaki, M., Frey, M., Berens, P., Preston-Ferrer, P. & Burgalossi, A. Sparse activity of  
806 identified dentate granule cells during spatial exploration. *Elife* **5**,  
807 doi:10.7554/eLife.20252 (2016).

- 808 31 GoodSmith, D. *et al.* Spatial Representations of Granule Cells and Mossy Cells of the  
809 Dentate Gyrus. *Neuron* **93**, 677-690 e675, doi:10.1016/j.neuron.2016.12.026 (2017).
- 810 32 Senzai, Y. & Buzsaki, G. Physiological Properties and Behavioral Correlates of  
811 Hippocampal Granule Cells and Mossy Cells. *Neuron* **93**, 691-704 e695,  
812 doi:10.1016/j.neuron.2016.12.011 (2017).
- 813 33 Danielson, N. B. *et al.* In Vivo Imaging of Dentate Gyrus Mossy Cells in Behaving Mice.  
814 *Neuron* **93**, 552-559 e554, doi:10.1016/j.neuron.2016.12.019 (2017).
- 815 34 Nahir, B., Bhatia, C. & Frazier, C. J. Presynaptic inhibition of excitatory afferents to hilar  
816 mossy cells. *J Neurophysiol* **97**, 4036-4047, doi:10.1152/jn.00069.2007 (2007).
- 817 35 Hedrick, T. P. *et al.* Excitatory Synaptic Input to Hilar Mossy Cells under Basal and  
818 Hyperexcitable Conditions. *eNeuro* **4**, doi:10.1523/ENEURO.0364-17.2017 (2017).
- 819 36 Leschik, J. *et al.* Prominent Postsynaptic and Dendritic Exocytosis of Endogenous BDNF  
820 Vesicles in BDNF-GFP Knock-in Mice. *Mol Neurobiol* **56**, 6833-6855, doi:10.1007/s12035-  
821 019-1551-0 (2019).
- 822 37 Ribeiro, J. A. & Sebastiao, A. M. On the role, inactivation and origin of endogenous  
823 adenosine at the frog neuromuscular junction. *J Physiol* **384**, 571-585,  
824 doi:10.1113/jphysiol.1987.sp016470 (1987).
- 825 38 Zimmermann, H. Ectonucleotidases in the nervous system. *Novartis Found Symp* **276**,  
826 113-128; discussion 128-130, 233-117, 275-181 (2006).
- 827 39 Wall, M. & Dale, N. Activity-dependent release of adenosine: a critical re-evaluation of  
828 mechanism. *Curr Neuropharmacol* **6**, 329-337, doi:10.2174/157015908787386087  
829 (2008).
- 830 40 Arch, J. R. & Newsholme, E. A. Activities and some properties of 5'-nucleotidase,  
831 adenosine kinase and adenosine deaminase in tissues from vertebrates and  
832 invertebrates in relation to the control of the concentration and the physiological role of  
833 adenosine. *Biochem J* **174**, 965-977, doi:10.1042/bj1740965 (1978).
- 834 41 Lee, F. S. & Chao, M. V. Activation of Trk neurotrophin receptors in the absence of  
835 neurotrophins. *Proc Natl Acad Sci U S A* **98**, 3555-3560, doi:10.1073/pnas.061020198  
836 (2001).
- 837 42 Correia-de-Sa, P., Sebastiao, A. M. & Ribeiro, J. A. Inhibitory and excitatory effects of  
838 adenosine receptor agonists on evoked transmitter release from phrenic nerve ending of  
839 the rat. *Br J Pharmacol* **103**, 1614-1620, doi:10.1111/j.1476-5381.1991.tb09836.x (1991).
- 840 43 Pousinha, P. A., Diogenes, M. J., Ribeiro, J. A. & Sebastiao, A. M. Triggering of BDNF  
841 facilitatory action on neuromuscular transmission by adenosine A2A receptors. *Neurosci*  
842 *Lett* **404**, 143-147, doi:10.1016/j.neulet.2006.05.036 (2006).
- 843 44 Dixon, A. K., Gubitza, A. K., Sirinathsinghji, D. J., Richardson, P. J. & Freeman, T. C. Tissue  
844 distribution of adenosine receptor mRNAs in the rat. *Br J Pharmacol* **118**, 1461-1468,  
845 doi:10.1111/j.1476-5381.1996.tb15561.x (1996).
- 846 45 Dias, R. B., Rombo, D. M., Ribeiro, J. A., Henley, J. M. & Sebastiao, A. M. Adenosine:  
847 setting the stage for plasticity. *Trends Neurosci* **36**, 248-257,  
848 doi:10.1016/j.tins.2012.12.003 (2013).

- 849 46 Duster, R., Prickaerts, J. & Blokland, A. Purinergic signaling and hippocampal long-term  
850 potentiation. *Curr Neuropharmacol* **12**, 37-43, doi:10.2174/1570159X113119990045  
851 (2014).
- 852 47 Pousinha, P. A., Correia, A. M., Sebastiao, A. M. & Ribeiro, J. A. Predominance of  
853 adenosine excitatory over inhibitory effects on transmission at the neuromuscular  
854 junction of infant rats. *J Pharmacol Exp Ther* **332**, 153-163, doi:10.1124/jpet.109.157255  
855 (2010).
- 856 48 Correia-de-Sa, P., Timoteo, M. A. & Ribeiro, J. A. Presynaptic A1 inhibitory/A2A  
857 facilitatory adenosine receptor activation balance depends on motor nerve stimulation  
858 paradigm at the rat hemidiaphragm. *J Neurophysiol* **76**, 3910-3919,  
859 doi:10.1152/jn.1996.76.6.3910 (1996).
- 860 49 Sebastiao, A. M. & Ribeiro, J. A. Adenosine receptors and the central nervous system.  
861 *Handb Exp Pharmacol*, 471-534, doi:10.1007/978-3-540-89615-9\_16 (2009).
- 862 50 Alzheimer, C., Rohrenbeck, J. & ten Bruggencate, G. Adenosine depresses induction of  
863 LTP at the mossy fiber-CA3 synapse in vitro. *Brain Res* **543**, 163-165, doi:10.1016/0006-  
864 8993(91)91061-5 (1991).
- 865 51 Forghani, R. & Krnjevic, K. Adenosine antagonists have differential effects on induction of  
866 long-term potentiation in hippocampal slices. *Hippocampus* **5**, 71-77,  
867 doi:10.1002/hipo.450050109 (1995).
- 868 52 Bui, A. D. *et al.* Dentate gyrus mossy cells control spontaneous convulsive seizures and  
869 spatial memory. *Science* **359**, 787-790, doi:10.1126/science.aan4074 (2018).
- 870 53 Fredes, F. *et al.* Ventro-dorsal Hippocampal Pathway Gates Novelty-Induced Contextual  
871 Memory Formation. *Curr Biol* **31**, 25-38 e25, doi:10.1016/j.cub.2020.09.074 (2021).
- 872 54 Fontinha, B. M. *et al.* Adenosine A(2A) receptor modulation of hippocampal CA3-CA1  
873 synapse plasticity during associative learning in behaving mice.  
874 *Neuropsychopharmacology* **34**, 1865-1874, doi:10.1038/npp.2009.8 (2009).
- 875 55 Wei, C. J. *et al.* Regulation of fear responses by striatal and extrastriatal adenosine A2A  
876 receptors in forebrain. *Biol Psychiatry* **75**, 855-863, doi:10.1016/j.biopsych.2013.05.003  
877 (2014).
- 878 56 Beamer, E., Kuchukulla, M., Boison, D. & Engel, T. ATP and adenosine-Two players in the  
879 control of seizures and epilepsy development. *Prog Neurobiol* **204**, 102105,  
880 doi:10.1016/j.pneurobio.2021.102105 (2021).
- 881 57 El Yacoubi, M., Ledent, C., Parmentier, M., Costentin, J. & Vaugeois, J. M. Evidence for  
882 the involvement of the adenosine A(2A) receptor in the lowered susceptibility to  
883 pentylenetetrazol-induced seizures produced in mice by long-term treatment with  
884 caffeine. *Neuropharmacology* **55**, 35-40, doi:10.1016/j.neuropharm.2008.04.007 (2008).
- 885 58 El Yacoubi, M., Ledent, C., Parmentier, M., Costentin, J. & Vaugeois, J. M. Adenosine A2A  
886 receptor deficient mice are partially resistant to limbic seizures. *Naunyn Schmiedebergs*  
887 *Arch Pharmacol* **380**, 223-232, doi:10.1007/s00210-009-0426-8 (2009).
- 888 59 Jones, P. A., Smith, R. A. & Stone, T. W. Protection against hippocampal kainate  
889 excitotoxicity by intracerebral administration of an adenosine A2A receptor antagonist.  
890 *Brain Res* **800**, 328-335, doi:10.1016/s0006-8993(98)00540-x (1998).

- 891 60 Lee, H. K., Choi, S. S., Han, K. J., Han, E. J. & Suh, H. W. Roles of adenosine receptors in  
892 the regulation of kainic acid-induced neurotoxic responses in mice. *Brain Res Mol Brain*  
893 *Res* **125**, 76-85, doi:10.1016/j.molbrainres.2004.03.004 (2004).
- 894 61 Rosim, F. E. *et al.* Differential neuroprotection by A(1) receptor activation and A(2A)  
895 receptor inhibition following pilocarpine-induced status epilepticus. *Epilepsy Behav* **22**,  
896 207-213, doi:10.1016/j.yebeh.2011.07.004 (2011).
- 897 62 Fukuda, M., Suzuki, Y., Hino, H., Morimoto, T. & Ishii, E. Activation of central adenosine  
898 A(2A) receptors lowers the seizure threshold of hyperthermia-induced seizure in  
899 childhood rats. *Seizure* **20**, 156-159, doi:10.1016/j.seizure.2010.11.012 (2011).
- 900 63 Sandau, U. S. *et al.* Adenosine Kinase Deficiency in the Brain Results in Maladaptive  
901 Synaptic Plasticity. *J Neurosci* **36**, 12117-12128, doi:10.1523/JNEUROSCI.2146-16.2016  
902 (2016).
- 903 64 McNamara, J. O. & Scharfman, H. E. in *Jasper's Basic Mechanisms of the Epilepsies* (eds  
904 th *et al.*) (2012).
- 905 65 Botterill, J. J. *et al.* An Excitatory and Epileptogenic Effect of Dentate Gyrus Mossy Cells in  
906 a Mouse Model of Epilepsy. *Cell Rep* **29**, 2875-2889 e2876,  
907 doi:10.1016/j.celrep.2019.10.100 (2019).
- 908 66 Lujan, R., Nusser, Z., Roberts, J. D., Shigemoto, R. & Somogyi, P. Perisynaptic location of  
909 metabotropic glutamate receptors mGluR1 and mGluR5 on dendrites and dendritic  
910 spines in the rat hippocampus. *Eur J Neurosci* **8**, 1488-1500, doi:10.1111/j.1460-  
911 9568.1996.tb01611.x (1996).
- 912
- 913

914 **FIGURE LEGENDS**

915

916 **Figure 1: Theta-burst firing of a single postsynaptic GC induces presynaptic LTP at**  
917 **MC-GC synapse**

918 **(a)** *Left*, Diagram illustrating the recording configuration. MC and MPP EPSCs were  
919 recorded from the same GC and evoked with stimulation electrodes placed in the inner  
920 and middle molecular layer, respectively. *Right*, Current clamp recording showing GC  
921 theta-burst firing (GC TBF). LTP induction protocol (GC TBF) was composed of 10 bursts  
922 at 5 Hz of 5 action potentials at 50 Hz, repeated 4 time every 5 s.

923 **(b)** *Left*, Representative traces before (1) and after (2) GC TBF delivery. *Right*, Time-  
924 course plot showing that GC TBF induced LTP at MC-GC but not at MPP-GC synapses.

925 **(c)** GC TBF-induced LTP was associated with significant reduction in PPR and CV ( $n =$   
926 13 cells).

927 **(d)** LTP was blocked when TrkB was conditionally knocked out from from GCs (Post TrkB  
928 cKO, *TrkB<sup>fl/fl</sup>* mice injected with AAV5.CaMKII.Cre.GFP). LTP was unaffected in control  
929 animals (Control, *TrkB<sup>fl/fl</sup>* mice injected with AAV5.CaMKII.eGFP).

930 **(e)** LTP was normally induced when loading PKI<sub>6-22</sub> (2.5  $\mu$ M) in GCs via the recording  
931 pipette but completely blocked when the cell-permeant PKA inhibitor PKI<sub>14-22</sub> myristoylated  
932 (1  $\mu$ M) was bath applied.

933 **(f)** Summary bar graph showing the magnitude of GC TBF induced LTP in the presence  
934 of DGC-IV (1  $\mu$ M), when TrkB was conditionally knocked out from MCs (Pre TrkB cKO),  
935 when loading the PKI<sub>6-22</sub> (2.5  $\mu$ M) in GCs and in presence of D-APV (50  $\mu$ M). LTP was  
936 abolished in presence of the TrkB antagonist ANA-12 (15  $\mu$ M), Botox (0.5  $\mu$ M loaded  
937 postsynaptically), postsynaptic BDNF and TrkB cKO, and bath application of the PKA  
938 inhibitors H89 (10  $\mu$ M) or PKI<sub>14-22</sub> myristoylated (1  $\mu$ M).

939 Numbers in parentheses indicate the number of cells. Data are presented as mean  $\pm$  SEM.

940

941

942 **Figure 2: MC-GC LTP does not require conventional retrograde messengers**

943 **(a)** Bath application of the NO synthase inhibitor L-NAME (100  $\mu$ M, 50- to 90-min pre-  
944 incubation and bath applied) did not impair MC-GC LTP.

945 **(b)** Positive controls for L-NAME. Extracellular recordings in CA1 *stratum radiatum*

946 showing that L-NAME blocked LTP at SC-CA1 synapses induced by 4 HFS (100 pulses  
947 at 100 Hz repeated 4 times every 10 s) at 25 °C.

948 **(c)** Application of cocktail of lipase inhibitors AACOCF3 (10  $\mu$ M, 50- to 90-min pre-  
949 incubation and bath applied), Baicalein (3  $\mu$ M, 50- to 90-min pre-incubation and bath  
950 applied), and THL (4  $\mu$ M loaded in the recording pipette) did not affect MC-GC LTP.

951 **(d)** Positive controls for AACOCF3 and Baicalein. Extracellular recordings in CA1 *stratum*  
952 *radiatum* showing that application of AACOCF3 and Baicalein significantly reduced LFS  
953 (900 pulses at 1 Hz)-induced LTD at SC-CA1 synapses.

954 **(e)** Positive control for the lipase inhibitor THL showing that loading THL in CA1 pyramidal  
955 neuron via the recording pipette blocked iLTD induced by TBS (10 bursts at 5 Hz of 5  
956 pulses at 100 Hz, repeated every 5 s, 4 times).

957 Numbers in parentheses represent number of cells. Data are presented as mean  $\pm$  SEM.

958  
959 **Figure 3: MC-GC LTP requires activation of presynaptic A<sub>2A</sub>Rs whereas A<sub>1</sub>Rs**  
960 **dampen LTP.**

961 **(a)** Bath application of the A<sub>2A</sub>R selective antagonists SCH 58261 (100 nM) and  
962 ZM241385 (50 nM) blocked GC TBF-induced LTP.

963 **(b)** SCH 58261 (100 nM) did not change basal EPSC amplitude.

964 **(c)** SCH 58261 (100 nM) abolished LTP induced by BDNF puffs (8 nm, 2 puffs of 3 s in  
965 the IML), as compared with interleaved controls.

966 **(d)** *Left*, loading GDP $\beta$ S in the recording pipette did not affect MC-GC LTP. *Right*, positive  
967 control showing that replacing GTP by 1 mM GDP $\beta$ S in the internal solution efficiently  
968 abolished the GABA<sub>B</sub> receptor agonist (baclofen, 10  $\mu$ M)-induced increase in holding  
969 current.

970 **(e, f)** Presynaptic A<sub>2A</sub>R cKO abolished MC-GC LTP. **(e)** *Left*, A mix of AAV5.CamKII.Cre-  
971 mCherry and AAV<sub>DJ</sub>.hSyn.Flex.ChIEF.Tdtomato was injected unilaterally into the DG of  
972 A<sub>2A</sub>R<sup>fl/fl</sup> (cKO) or WT (control) mice. MC EPSCs were light-evoked and recorded in  
973 contralateral DG. *Right*, Infrared/differential interference contrast (IR/DIC, left images) and  
974 fluorescence (right) images showing that ChIEF-TdTomato was expressed in MC soma in  
975 ipsilateral DG (top) and selectively in putative MC axons (bottom) of contralateral IML. **(f)**  
976 MC-GC LTP was abolished in presynaptic A<sub>2A</sub>R conditional knockout mice as compared



977 with controls.

978 **(g)** MC-GC LTP magnitude was increased in the presence of the A<sub>1</sub>R selective antagonist  
979 DPCPX (100 nM) as compared to interleaved control experiments.

980 **(h)** Application of DPCPX (100 nM) did not change basal EPSC amplitude at MC-GC and  
981 MPP-GC synapses.

982 Numbers in parentheses represent number of cells. Data are presented as mean ± SEM.

983  
984 **Figure 4: Subcellular localization of the A<sub>1</sub> and A<sub>2A</sub> adenosine receptors in the**  
985 **molecular layer of the dentate gyrus.**  
986

987 **(a-c, e-g)** Electron micrographs of the molecular layer of the dentate gyrus showing  
988 immunoreactivity for A<sub>1</sub>Rs and A<sub>2A</sub>Rs revealed by pre-embedding immunogold methods.

989 **(a-c)** Both at MC-GC **(a and b)** and PP-GC **(c)** putative synapses, immunoparticles for  
990 A<sub>1</sub>R were mainly observed on the presynaptic plasma membrane (arrowheads) of axon  
991 terminals (at), with very low frequency in postsynaptic sites (arrows) of spines (s) or  
992 dendritic shafts (Den).

993 **(d)** Quantitative analysis of the relative number of immunoparticles found in the  
994 presynaptic membrane for A<sub>1</sub>R at MC-GC and MPP-GC putative synapses. From the total  
995 number of immunoparticles detected (n = 490 for MC-GC; n = 419 for MPP-GC synapses,  
996 N = 3 mice), 468 (95.5%) and 402 (95.9%) were present in presynaptic sites of MC-GC  
997 and MPP-GC putative synapses, respectively.

998 **(e-h)** Electron micrographs **(e-g)** and quantitative analysis **(h)** showing that, at putative  
999 MC-GC synapses **(e, f and h)**, immunoparticles for A<sub>2A</sub>R were mainly detected  
1000 presynaptically (91.0%) whereas they were mainly found on the postsynaptic plasma  
1001 membrane (92.0%) of putative PP-GC synapses **(g and h)**. Total number of  
1002 immunoparticles: n = 668 for MC-GC; n = 690 for MPP-GC synapses, N = 3 mice.

1003 Scale bars: 200 nm.

1004  
1005 **Figure 5: A<sub>2A</sub>R activation is sufficient to trigger PKA-dependent LTP at MC-GC but**  
1006 **not at MPP-GC synapses.**

1007 **(a)** Representative traces *(left)* and time-course summary plot *(right)* showing that bath  
1008 application of the A<sub>2A</sub>R selective agonist CGS21680 (50 nM) potentiated MC-GC but not

1009 MPP-GC synaptic transmission.

1010 **(b)** CGS21680-induced potentiation at MC-GC synapse was associated with a significant  
1011 reduction of both PPR and CV. \*\*  $p < 0.01$ ;  $n = 9$  cells.

1012 **(c)** CGS21680 induced long-lasting potentiation even when the  $A_{2A}R$  selective antagonist  
1013 SCH 58261 (100 nM) was included during CGS21680 washout. CGS21680-induced LTP  
1014 was completely abolished in continuous presence of SCH 58261.

1015 **(d)** Loading the selective PKA blocker PKI<sub>6-22</sub> (2.5  $\mu$ M) in GCs via the recording pipette  
1016 did not impair CGS21680-induced LTP while bath application of the cell-permeant PKA  
1017 inhibitor PKI<sub>14-22</sub> myristoylated (1  $\mu$ M) completely blocked LTP.

1018 **(e)** Bath application of ANA-12 (15  $\mu$ M) did not impair CGS21680-induced LTP.

1019 **(f)** Positive control in interleaved experiments showing that ANA-12 (15  $\mu$ M) efficiently  
1020 blocked GC TBF-induced LTP.

1021 Numbers in parentheses represent number of cells. Data are presented as mean  $\pm$  SEM.

1022

1023 **Figure 6: MC-GC LTP requires passive release of adenosine from GCs, via ENTs.**

1024 **(a)** Representative traces (*left*) and time-course summary plot (*right*) showing that GC TBF  
1025 failed to induce LTP in presence of the ENT blockers (20  $\mu$ M of dipyridamole and 10  $\mu$ M  
1026 of NBMPR) as compared with interleaved controls.

1027 **(b)** Bath application of the ENT blockers (20  $\mu$ M of dipyridamole and 10  $\mu$ M of NBMPR)  
1028 did not change basal MC-GC EPSC amplitude.

1029 **(c)** Co-application of the ENT blockers (20  $\mu$ M of dipyridamole and 10  $\mu$ M of NBMPR) and  
1030 the  $A_1R$  antagonist DPCPX (100 nM) increased EPSC amplitude in control condition but  
1031 not in presence of the  $A_{2A}R$  antagonist SCH 58261 (100 nM).

1032 **(d)** Including inosine (100  $\mu$ M) in the recording solution completely prevented GC TBF-  
1033 induced LTP.

1034 **(e)** Bath application of inosine (100  $\mu$ M) did not change basal MC-GC EPSC amplitude.

1035 **(f)** Bath application of DPCPX (100 nM) increased EPSC amplitude when the ENT  
1036 blockers (20  $\mu$ M of dipyridamole and 10  $\mu$ M of NBMPR) were included in the bath but not  
1037 when inosine (100  $\mu$ M) was loaded in the postsynaptic neuron *via* the patch pipette.

1038 Numbers in parentheses represent number of cells. Data are represented as mean  $\pm$   
1039 SEM.

1040

1041 **Figure 7: Induction of MC-GC LTP triggers a transient TrkB-dependent increase in**  
1042 **extracellular adenosine level**

1043 **(a)** AAV9.hSyn.GRAB.Ado1.0m (GRAB<sub>Ado</sub>) was injected unilaterally in the DG of WT mice.  
1044 Two-photon image (*bottom*) showing GRAB<sub>Ado</sub> was selectively expressed in putative MC  
1045 axons in contralateral IML.

1046 **(b, c)** Two-photon images **(b)** showing GRAB<sub>Ado</sub> fluorescence intensity increased during  
1047 burst electrical stimulation of MC axon terminals (MC BS) in normal ACSF (control) but  
1048 not in the presence of A<sub>2A</sub> receptor antagonist SCH58261 (100 nM). Time-course  
1049 summary plot of the average fractional fluorescence changes ( $\Delta F/F_0$ ) with time are shown  
1050 in **c**.

1051 **(d, e)** Two-photon images **(d)** and time-course summary plot **(e)** showing how MC BS  
1052 failed to increase GRAB<sub>Ado</sub> fluorescence in presence of the TrkB receptor antagonist ANA-  
1053 12 (15  $\mu$ M) or when TrkB was conditionally knocked out from GCs (Post TrkB cKO).

1054 **(f)** Quantification of the averaged responses during burst stimulation of MCs (15-25 s) \* p  
1055 < 0.05, \*\* p < 0.01, \*\*\* p < 0.001; one-way ANOVA.

1056 Number of slices are shown between parentheses. Data are represented as mean  $\pm$  SEM.

1057

1058 **Figure 8: *In vivo* release of adenosine during epileptic seizures likely promotes**  
1059 **seizures by activating A<sub>2A</sub>Rs**

1060 **(a)** AAV9.hSyn.GRAB.Ado1.0m (GRAB<sub>Ado</sub>) was injected unilaterally in the DG of WT mice.  
1061 An optic fiber was implanted above the contralateral IML. Fiber photometry was performed  
1062 3-5 weeks later to assess GRAB<sub>Ado</sub> fluorescence intensity before and after acute seizure  
1063 induction with kainic acid (KA, 30 mg/kg).

1064 **(b)** Confocal image showing fiber tract and GRAB<sub>Ado</sub> expression in the contralateral IML.

1065 **(c, d)** Time-course of representative experiment **(c)** and histogram **(d)** showing how KA  
1066 (30 mg/kg) administration increased the average fractional fluorescence ( $\Delta F/F_0$ ) of  
1067 GRAB<sub>Ado</sub>. \* p < 0.05, n = 5, paired t test.

1068 **(e)** Representation of the experimental timeline. AAV5-CaMKII-Cre-mCherry was injected  
1069 bilaterally into ventral and dorsal DG of WT (control) and A<sub>2A</sub>R<sup>fl/fl</sup> (cKO) mice. Mouse  
1070 behavior was assessed for 120 min following KA (20 mg/kg) administration.

1071  
1072 **(f)** Confocal images showing the viral expression in the DG of WT (top) and  $A_{2A}R^{fl/fl}$   
1073 (bottom) mice.

1074  
1075 **(g-i)** Deletion of  $A_{2A}R$  from DG excitatory neurons ( $A_{2A}R$  cKO,  $A_{2A}R^{fl/fl}$  mice injected with  
1076 AAV<sub>5</sub>-CaMKII-Cre-mCherry) significantly increased latency to convulsive seizures **(g, h)**  
1077 but did not affect seizure severity **(i)**. \*\*  $p < 0.01$ , unpaired t test.

1078  
1079 Numbers in parentheses represent number of mice. Data are presented as mean  $\pm$  SEM.  
1080

1081

## 1082 SUPPLEMENTAL FIGURE LEGENDS

### 1083 **Figure\_S1 (related to Figure 1): GC TBF-induced LTP properties**

1084 **(a)** GC TBF induced a normal LTP in presence of the group II mGluR agonist DCG-IV (1  
1085  $\mu$ M) as compared to interleaved controls.

1086 **(b)** TBF-induced LTP was blocked in presence of the TrkB selective antagonist ANA-12.

1087 **(c)** Presynaptic TrkB cKO did not impair GC TBF-induced LTP.  $TrkB^{fl/fl}$  mice were  
1088 unilaterally injected with a mix of AAV<sub>5</sub>.CaMKII.Cre and  
1089 AAV<sub>DJ</sub>.hSyn.Flex.ChiEF.Tdtomato. EPSCs were recorded in contralateral DG in response  
1090 to light stimulation of Cre<sup>+</sup> and ChiEF<sup>+</sup> MC axons (lacking TrkB).

1091 **(d)** GC TBF-induced LTP was blocked in GFP-Cre<sup>+</sup> GCs (BDNF cKO,  $Bdnf^{fl/fl}$  mice  
1092 injected with AAV<sub>5</sub>.CaMKII.Cre.GFP) as compared with GFP<sup>+</sup> GCs (control,  $Bdnf^{fl/fl}$  mice  
1093 injected with AAV<sub>5</sub>.CaMKII.eGFP).

1094 **(e)** Loading Botox (0.5  $\mu$ M) in the postsynaptic neuron via the patch pipette completely  
1095 abolished MC-GC LTP.

1096 **(f)** GC TBF failed to induce LTP in presence of the PKA inhibitor H89 (10  $\mu$ M, 40- to 60  
1097 min pre-incubation and bath applied, black circles).

1098 **(g)** Bath application of the selective NMDAR antagonist D-APV (50  $\mu$ M, black circles) did  
1099 not affect GC TBF-induced LTP, as compared with interleaved control experiments (white  
1100 circles). Representative traces are shown on the left and time-course summary plot on the  
1101 right.

1102 Numbers in parentheses represent number of cells. Data are presented as mean  $\pm$  SEM.

1103

### 1104 **Figure\_S2 (related to Figure 1): GC TBF- and MC BS-induced LTP occlude each**

1105 **other**

1106 **(a)** Representative single cell experiments showing how GC TBF induced a normal LTP  
1107 in naive slices (top) but not when MC BS was previously applied (bottom). Vertical dashed  
1108 line indicated the time point when stimulation intensity was reduced in order to avoid  
1109 potential ceiling effect.

1110 **(b)** Representative traces and time course summary plot showing how MC BS occluded  
1111 GC TBF -induced LTP.

1112 **(c)** Representative single cell experiments showing how MC BS induced a normal LTP in  
1113 naive slices (top) but not when GC TBF was previously applied (bottom). Vertical dashed  
1114 line indicated the time point when stimulation intensity was reduced in order to avoid  
1115 potential ceiling effect.

1116 **(d)** Pre-application of the GC TBF protocol occluded MC BS-induced LTP (black circles)  
1117 as compared with interleaved controls (naive, white circles).

1118 Numbers in parentheses represent number of cells. Data are presented as mean  $\pm$  SEM.

1119  
1120 **Figure\_S3 (related to Figure 2): MC-GC LTP does not require conventional**  
1121 **retrograde messengers**

1122 MC BS induced a normal LTP in presence of L-NAME **(a)**, AACOCF3 **(b)**, Baicalein **(c)** or  
1123 when THL was loaded **(d)** in the postsynaptic GC, as compared with interleaved controls.

1124 Numbers in parentheses represent number of cells. Data are presented as mean  $\pm$  SEM.

1125  
1126 **Figure S4 (related to fig 4): MC BS-induced LTP requires A<sub>2A</sub>R activation.**

1127 **(a)** Bath application of the A<sub>2A</sub>R selective antagonist SCH 58261 (100 nM) abolished LTP  
1128 induced by MC BS (5 pulses at 100 Hz repeated 50 times every 0.5 s).

1129 **(b)** *Left*, loading GDP $\beta$ s (1 mM) in the recording pipette did not affect LTP induced by MC  
1130 BS. *Right*, interleaved positive controls for GDP $\beta$ s showing that replacing GTP by 1 mM  
1131 GDP $\beta$ s in the recording pipette abolished baclofen (10  $\mu$ M)-induced increase in holding  
1132 current. Baclofen is a GABA<sub>B</sub> receptor selective agonist.

1133 Numbers in parentheses represent number of cells. Data are presented as mean  $\pm$  SEM.

1134  
1135 **Figure\_S5 (related to Figure 4): Activation of A<sub>1</sub>R induces a short-term depression**

1136 **at both MC-GC and MPP-GC synapses**

1137 **(a)** Bath application of CCPA (50 nM, 15 min), a selective adenosine A<sub>1</sub>R agonist, induced  
1138 a short-term depression at both MC-GC and MPP-GC synapses. The selective A<sub>1</sub>R  
1139 antagonist DPCPX (100 nM) was included in the washout of CCPA.

1140 **(b, c)** CCPA-induced depression was associated with a significant and reversible increase  
1141 in both PPR and CV, \*p < 0.05, n = 7, one-way ANOVA RM.

1142 **(d)** Bath application of the A<sub>1</sub>R antagonist DPCPX (100 nM) completely blocked CCPA-  
1143 induced depression.

1144 Numbers in parentheses represent number of cells. Data are presented as mean ± SEM.

1145  
1146 **Figure S6 (related to Figures 1-8). Adenosine is a retrograde messenger mediating**  
1147 **activity-dependent presynaptic LTP at the MC-GC synapse**  
1148

1149 Scheme illustrating the emerging model for the mechanism of activity-induced MC-GC  
1150 LTP. MC (MC BS) and GC bursts (GC TBF) of activity trigger BDNF release and  
1151 subsequent TrkB activation in GCs (1). Activation of postsynaptic TrkB leads to  
1152 intracellular accumulation of adenosine, which is passively released from GCs via ENTs  
1153 (2). Adenosine then activates presynaptic A<sub>1</sub>Rs and A<sub>2A</sub>Rs (3). A<sub>2A</sub>R activation induces a  
1154 long-lasting PKA-dependent increase in glutamate (glu) release (4), whereas A<sub>1</sub>R  
1155 activation dampens LTP.  
1156

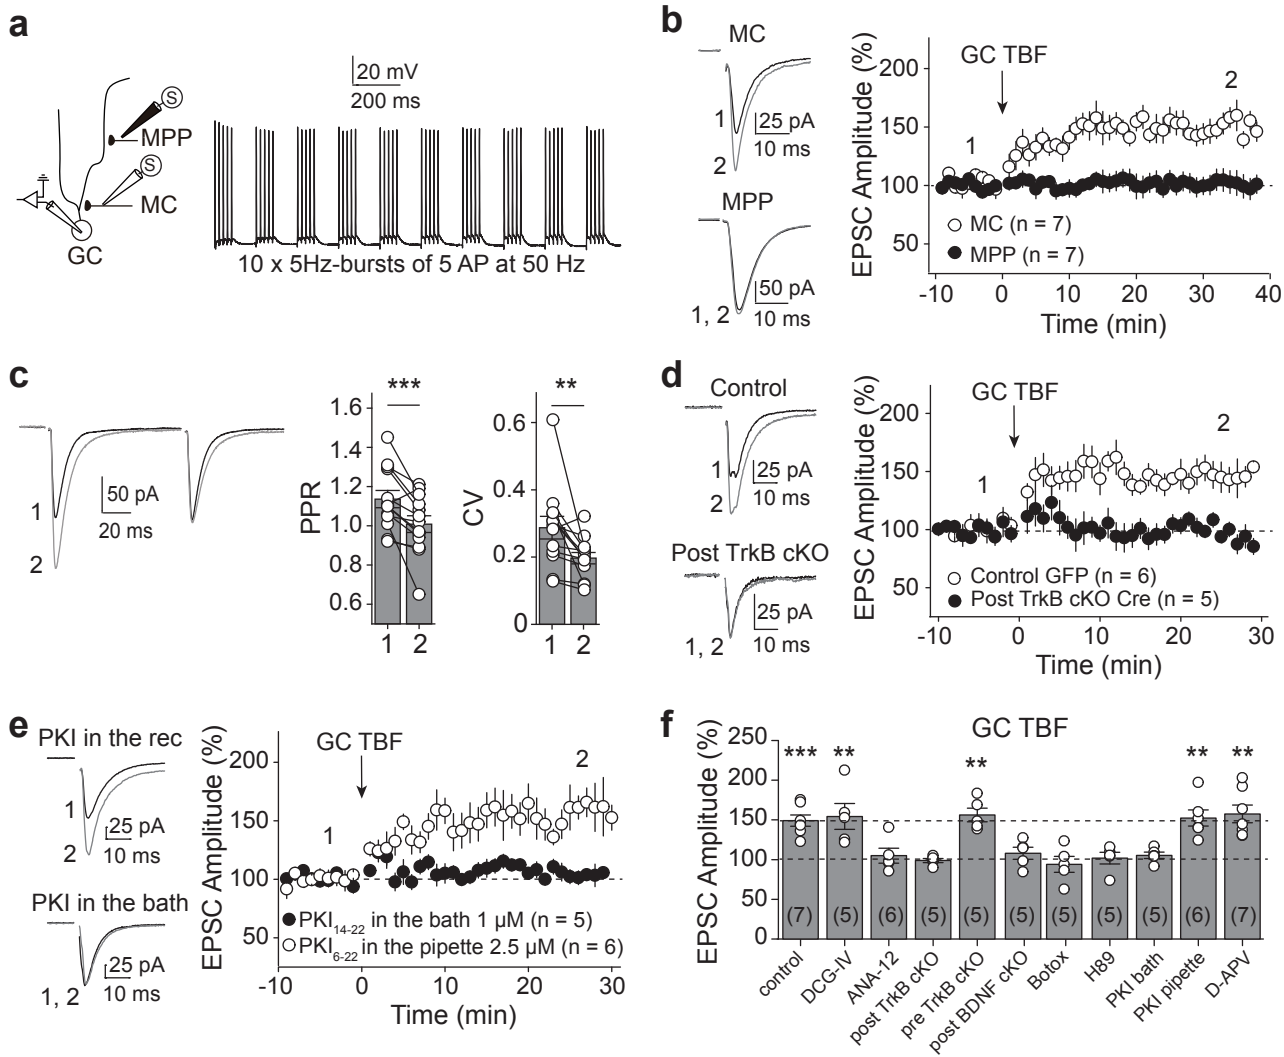

Figure 1

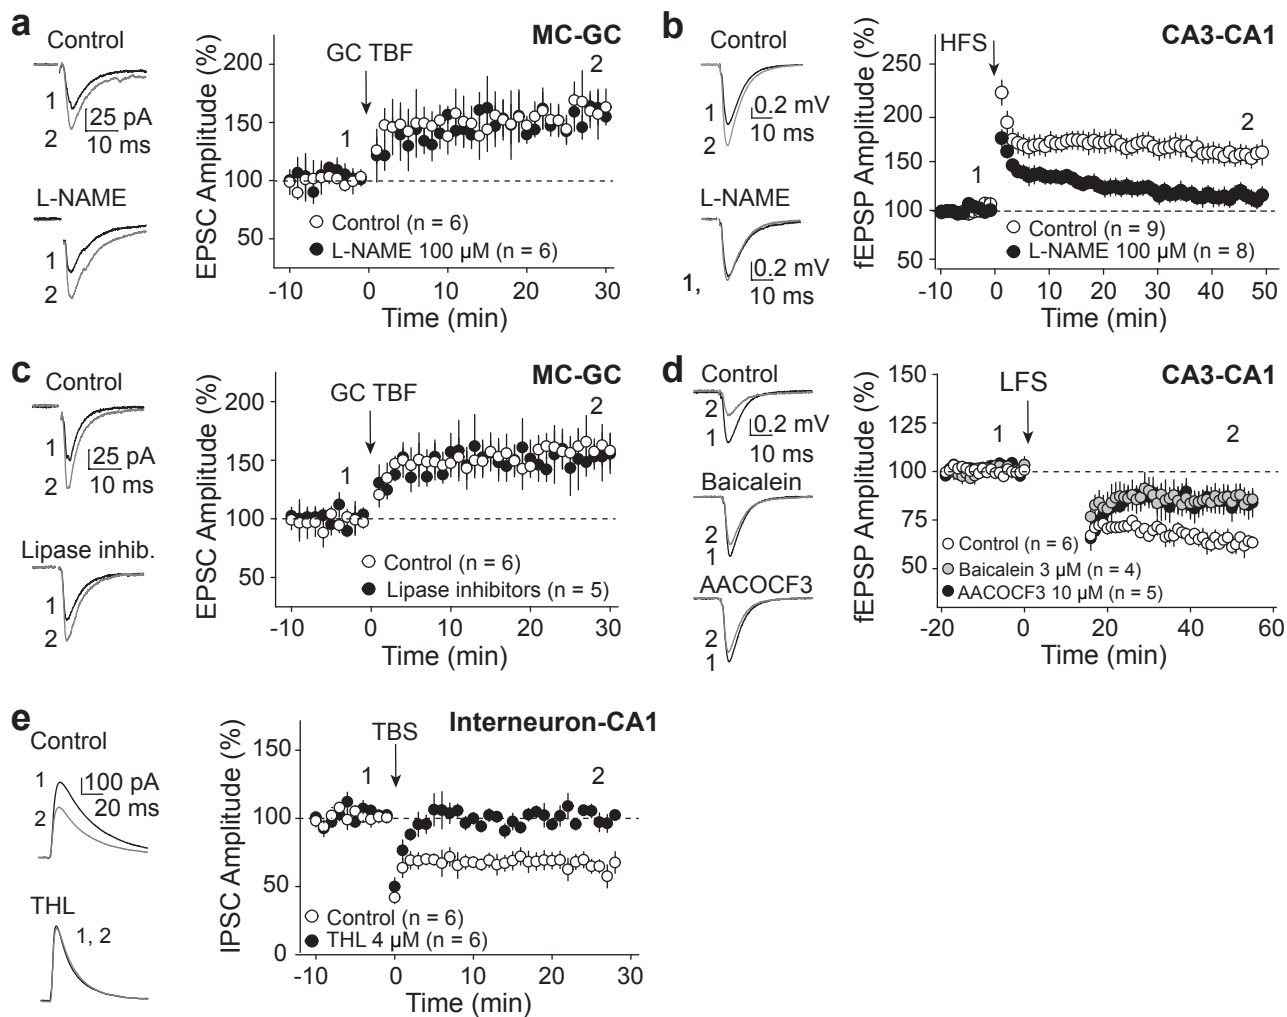

Figure 2



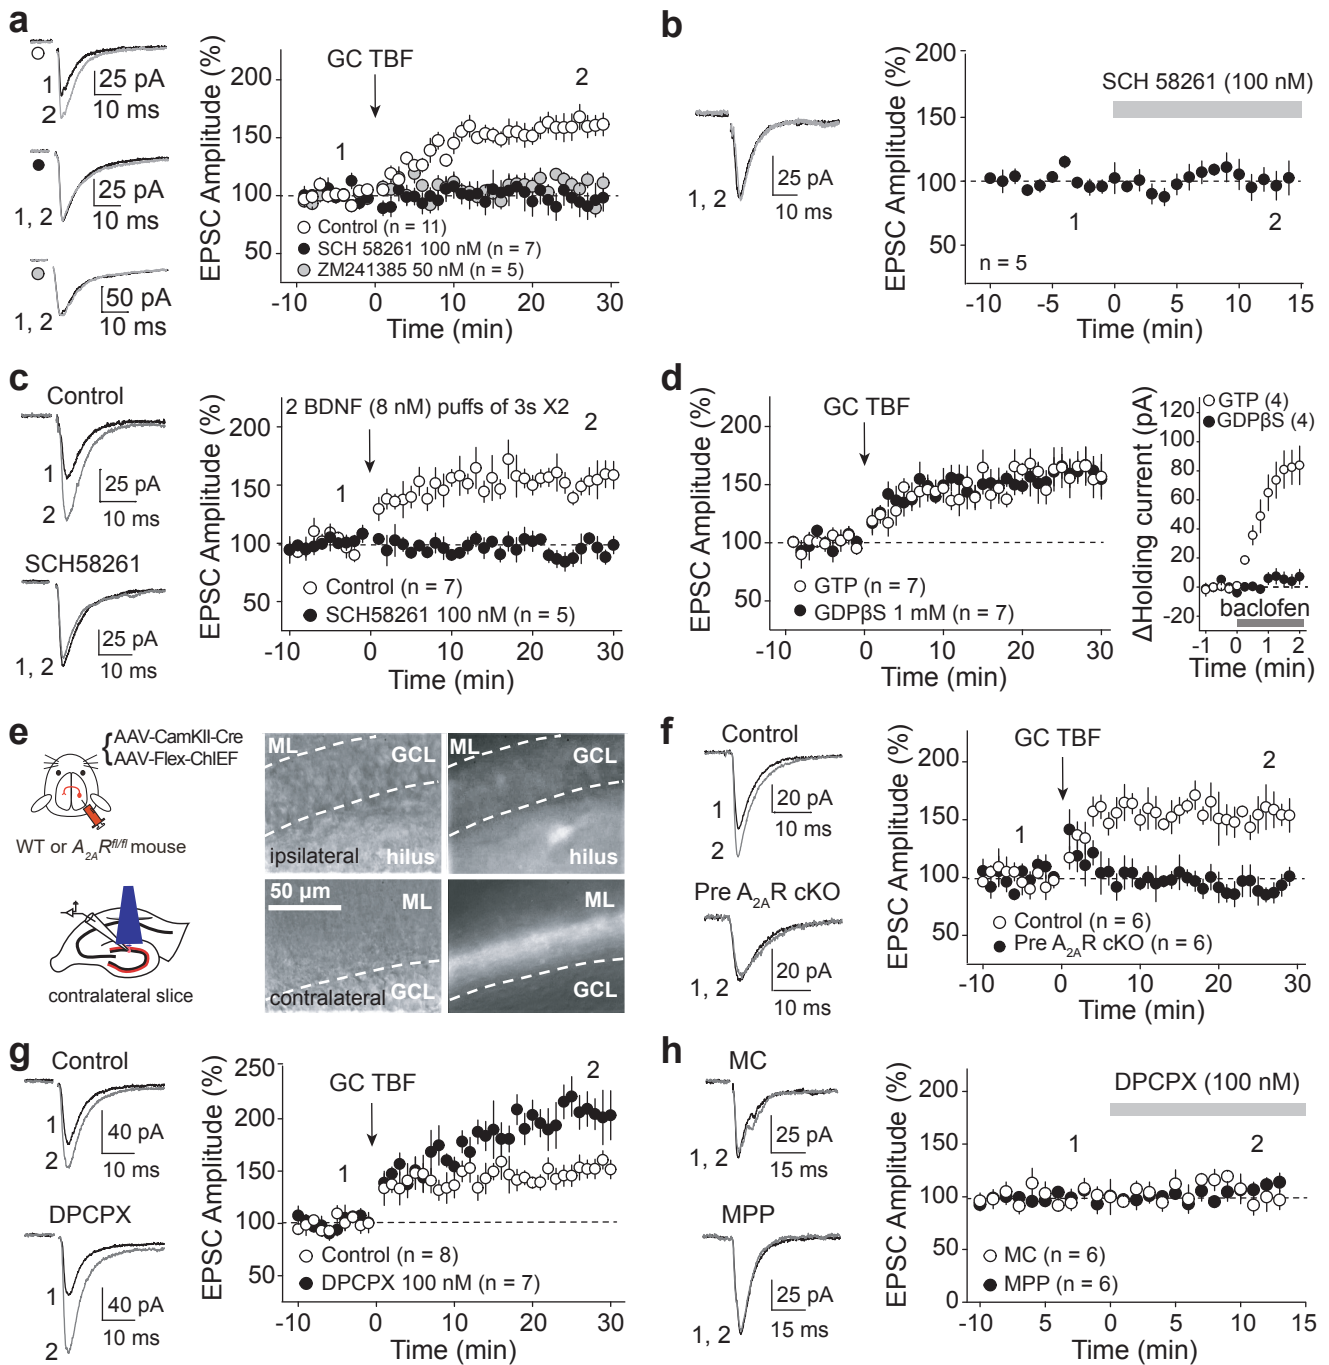

Figure 3

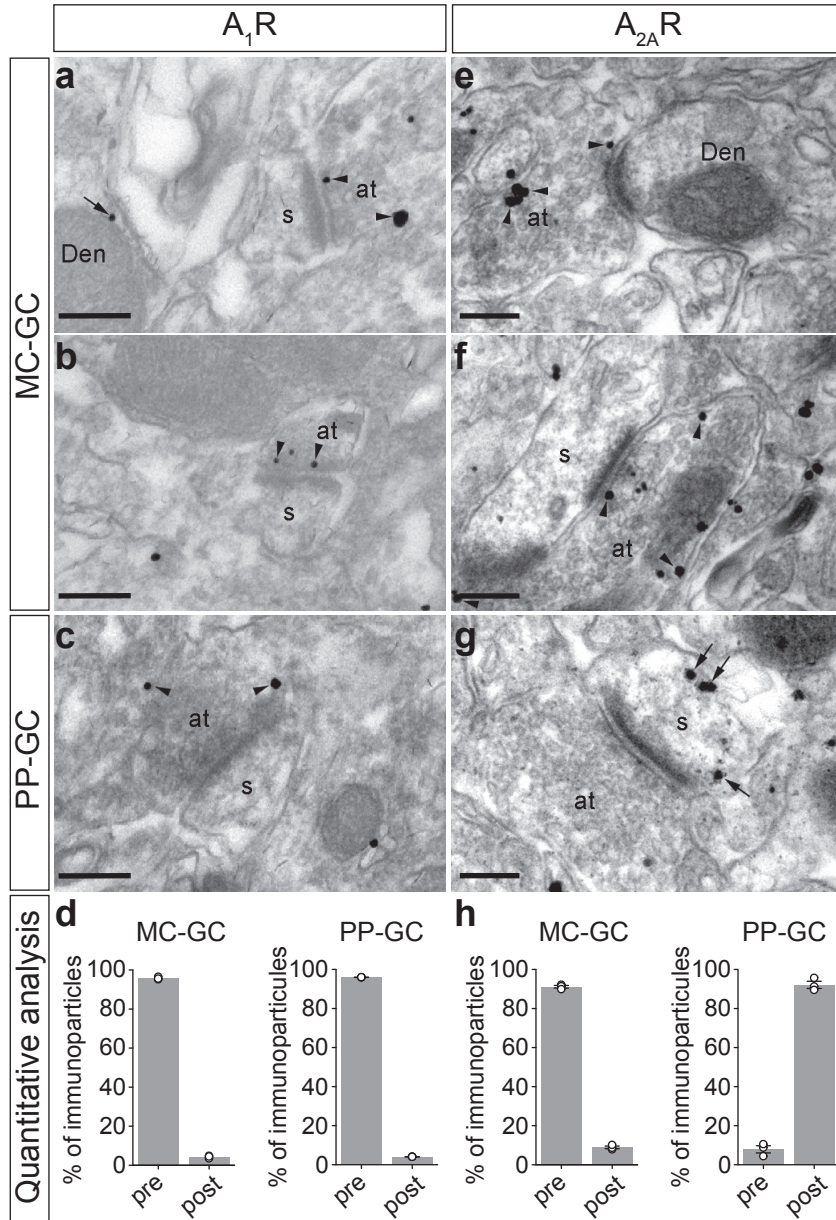

Figure 4

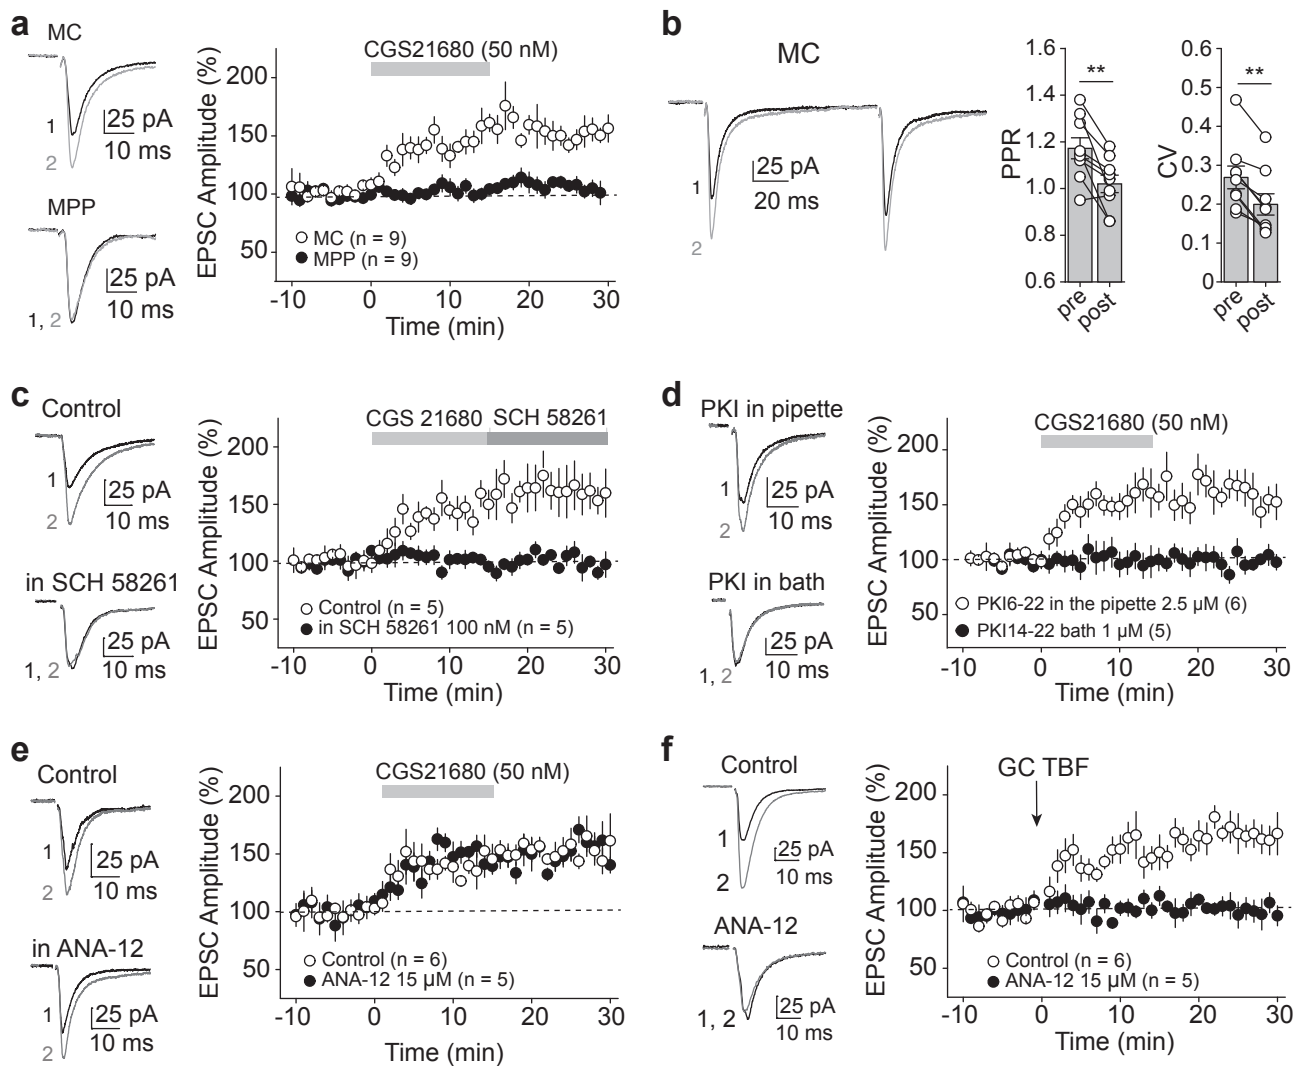

**Figure 5**

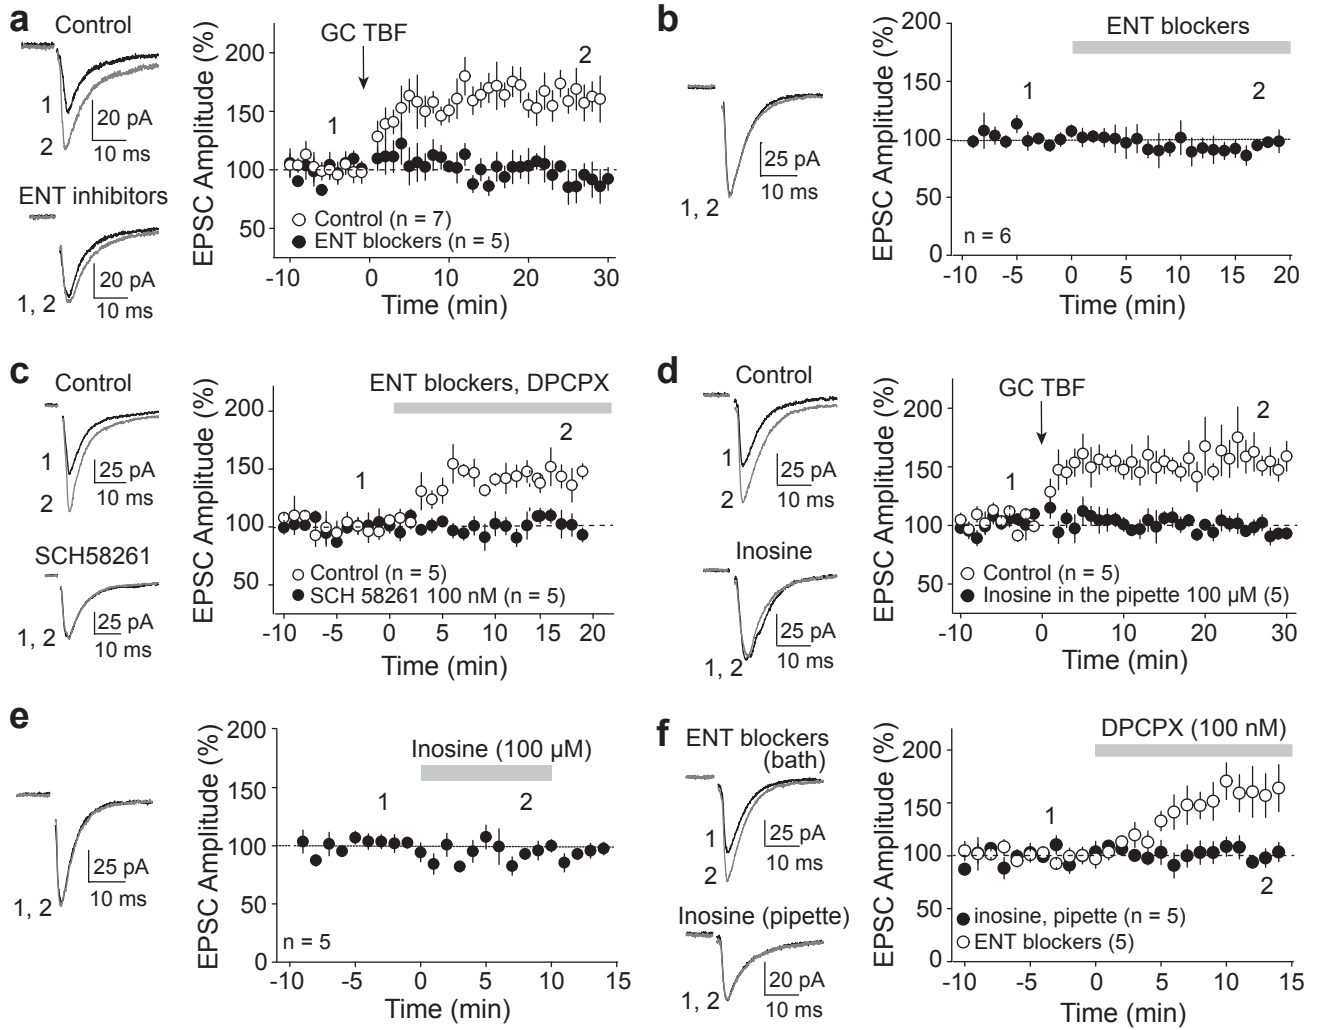

Figure 6

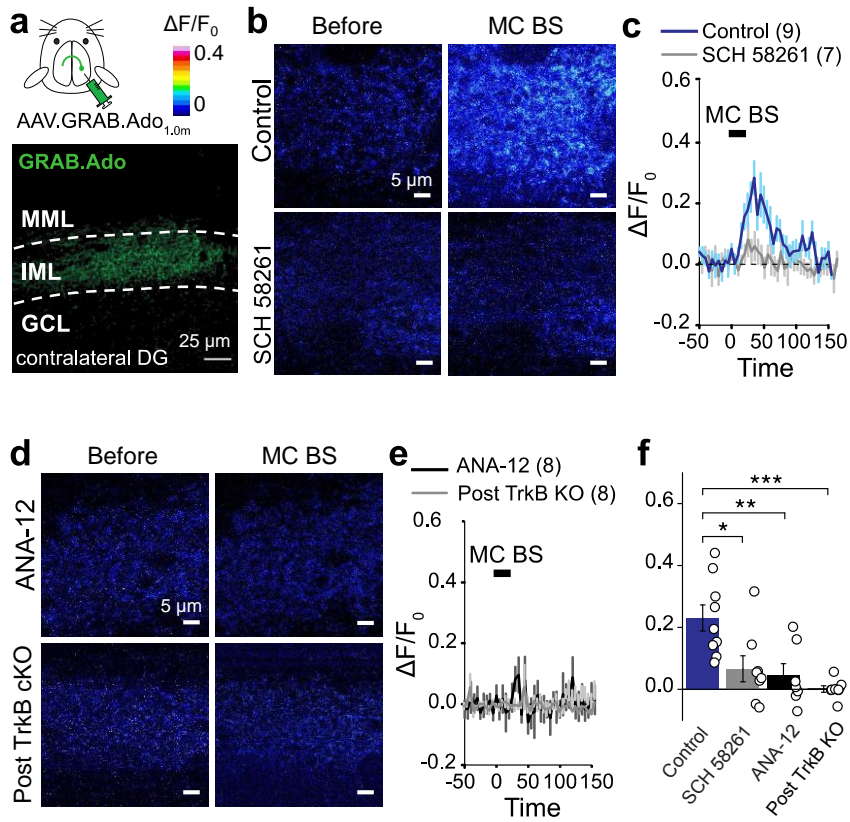

Figure 7

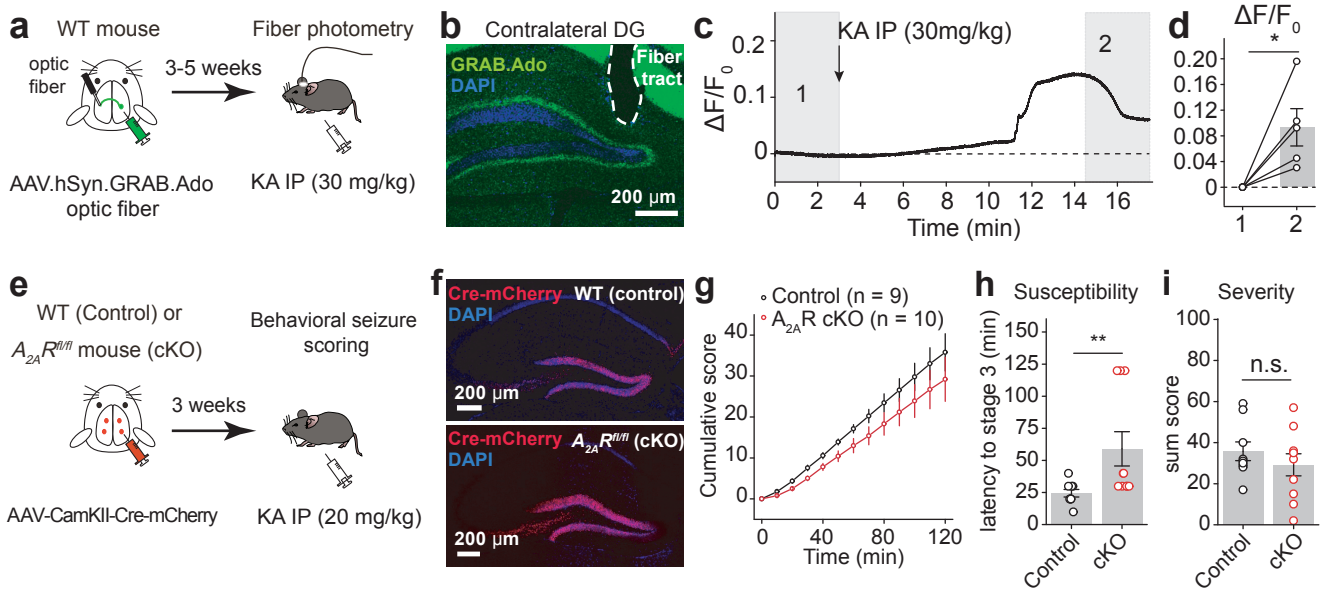

Figure 8
